# Supplementary material for: Dynamic microbe and molecule networks in a mouse model of colitis-associated colorectal cancer
Source: PubMed Central journal article supplement — Sci Rep. 2014 May 15;4:4985. doi: 10.1038/srep04985 (PMC4021569; doi:10.1038/srep04985), 2014-05-15
Supplement: srep04985-s1.pdf [file srep04985-s1.pdf]

---

## Dynamic microbe and molecule networks in a mouse model of colitis-associated colorectal cancer

Xujun Liang, Huiying Li, Geng Tian, Shao Li\*

### Supplementary information

**Table S1 Barcodes and sequences number of samples**

| <b>Sample ID</b> | <b>Barcode</b> | <b>Number of raw reads pairs</b> | <b>Number of sequences represented OTUs</b> |
|------------------|----------------|----------------------------------|---------------------------------------------|
| C11              | ACCTCA         | 1395623                          | 1043035                                     |
| C12              | GCCTAA         | 886917                           | 698154                                      |
| C21              | ACGGTA         | 1131961                          | 885619                                      |
| C22              | GATCTG         | 778751                           | 651044                                      |
| C31              | GTAGCC         | 1313896                          | 1091203                                     |
| C32              | AGTTGG         | 1178678                          | 909007                                      |
| C33              | CTCTCT         | 1013499                          | 784671                                      |
| C41              | GCTCAA         | 1154459                          | 960622                                      |
| C42              | CAAGTG         | 916887                           | 708493                                      |
| C43              | CCTTGA         | 786794                           | 614247                                      |
| M11              | TGGTCA         | 1117988                          | 904088                                      |
| M12              | ACCACT         | 1077346                          | 853359                                      |
| M21              | TCAAGT         | 805475                           | 672753                                      |
| M22              | AGTGTC         | 1254538                          | 956386                                      |
| M31              | TACAAG         | 1657483                          | 984927                                      |
| M32              | AGAAGG         | 1193755                          | 892718                                      |
| M33              | TTATCC         | 1048323                          | 801159                                      |
| M41              | TCGCTT         | 992498                           | 811872                                      |
| M42              | TTAAGG         | 1287952                          | 984538                                      |
| M43              | TTCTTG         | 1388517                          | 1037459                                     |
| M44              | TTCAAC         | 1117493                          | 823291                                      |

**Table S2 Differential OTUs between control and DSS treated groups**

| OTU      | logFC | P-Value  | FDR      | Taxonomy                             |
|----------|-------|----------|----------|--------------------------------------|
| OTU00354 | 8.95  | 1.36E-04 | 1.86E-03 | <i>uncl. S24-7</i>                   |
| OTU00491 | 8.53  | 3.44E-08 | 2.30E-06 | <i>uncl. Erysipelotrichaceae</i>     |
| OTU00199 | 7.75  | 1.22E-05 | 2.59E-04 | <i>Prevotella</i>                    |
| OTU00047 | 7.61  | 1.32E-07 | 7.72E-06 | <i>uncl. S24-7</i>                   |
| OTU00345 | 7.58  | 5.04E-05 | 8.40E-04 | <i>Lachnobacterium</i>               |
| OTU00063 | 7.46  | 5.13E-06 | 1.20E-04 | <i>uncl. S24-7</i>                   |
| OTU00728 | 7.01  | 3.86E-09 | 6.00E-07 | <i>Wandonia</i>                      |
| OTU00240 | 5.70  | 8.94E-05 | 1.39E-03 | <i>AF12</i>                          |
| OTU00276 | 5.23  | 5.97E-04 | 6.06E-03 | <i>Anaerostipes</i>                  |
| OTU00973 | 5.04  | 2.46E-04 | 2.73E-03 | <i>uncl. Rikenellaceae</i>           |
| OTU01356 | 4.77  | 1.23E-03 | 1.17E-02 | <i>Faecalibacterium prausnitzii</i>  |
| OTU00024 | 4.49  | 1.75E-04 | 2.25E-03 | <i>Bacteroides</i>                   |
| OTU00549 | 4.38  | 2.95E-03 | 2.46E-02 | <i>Moryella indoligenes</i>          |
| OTU00218 | 4.31  | 4.07E-03 | 3.12E-02 | <i>Ruminococcus</i>                  |
| OTU00111 | 4.30  | 1.34E-04 | 1.86E-03 | <i>Ruminococcus</i>                  |
| OTU00260 | 3.98  | 5.76E-04 | 5.97E-03 | <i>uncl. S24-7</i>                   |
| OTU00082 | 3.91  | 2.52E-06 | 6.91E-05 | <i>Bacteroides uniformis</i>         |
| OTU00363 | 3.82  | 3.61E-03 | 2.86E-02 | <i>Bacteroides ovatus</i>            |
| OTU00302 | 3.67  | 2.00E-03 | 1.77E-02 | <i>Coprococcus</i>                   |
| OTU00495 | 3.60  | 3.07E-03 | 2.51E-02 | <i>uncl. S24-7</i>                   |
| OTU00174 | 3.51  | 4.29E-04 | 4.66E-03 | <i>Moryella indoligenes</i>          |
| OTU00200 | 3.46  | 1.12E-03 | 1.09E-02 | <i>Moryella indoligenes</i>          |
| OTU01779 | 3.34  | 1.72E-03 | 1.54E-02 | <i>Streptococcus luteciae</i>        |
| OTU00358 | 3.22  | 4.85E-03 | 3.54E-02 | <i>Odoribacter</i>                   |
| OTU00907 | 3.20  | 4.83E-03 | 3.54E-02 | <i>Lactobacillus hamsteri</i>        |
| OTU00101 | 3.19  | 5.56E-03 | 3.87E-02 | <i>uncl. S24-7</i>                   |
| OTU00059 | 2.81  | 3.93E-03 | 3.06E-02 | <i>Coprococcus</i>                   |
| OTU00408 | 2.70  | 6.40E-03 | 4.30E-02 | <i>Roseburia faecis</i>              |
| OTU00161 | 2.70  | 3.42E-03 | 2.76E-02 | <i>Candidatus_Phytoplasma solani</i> |
| OTU00107 | 2.24  | 4.96E-03 | 3.56E-02 | <i>uncl. S24-7</i>                   |
| OTU00084 | 1.95  | 6.37E-03 | 4.30E-02 | <i>Oscillospira</i>                  |
| OTU00010 | -2.12 | 5.55E-03 | 3.87E-02 | <i>uncl. Rikenellaceae</i>           |
| OTU00198 | -2.26 | 6.45E-03 | 4.30E-02 | <i>uncl. Rikenellaceae</i>           |
| OTU00190 | -3.07 | 8.58E-04 | 8.53E-03 | <i>Faecalibacterium prausnitzii</i>  |
| OTU00048 | -3.26 | 2.53E-03 | 2.19E-02 | <i>Rikenella</i>                     |
| OTU00135 | -3.34 | 1.38E-05 | 2.80E-04 | <i>uncl. Lachnospiraceae</i>         |
| OTU01528 | -3.47 | 4.78E-03 | 3.54E-02 | <i>uncl. RF39</i>                    |
| OTU00441 | -3.48 | 1.36E-03 | 1.27E-02 | <i>Oribacterium</i>                  |
| OTU00108 | -3.61 | 2.69E-03 | 2.29E-02 | <i>uncl. S24-7</i>                   |
| OTU00191 | -3.65 | 5.59E-04 | 5.94E-03 | <i>cc_115</i>                        |
| OTU00393 | -3.73 | 1.49E-04 | 1.99E-03 | <i>Moryella indoligenes</i>          |

|          |       |          |          |                                                 |
|----------|-------|----------|----------|-------------------------------------------------|
| OTU00100 | -3.84 | 1.94E-04 | 2.30E-03 | <i>Ruminococcus gnavus</i>                      |
| OTU00068 | -4.15 | 1.43E-03 | 1.31E-02 | <i>uncl. Bacteroidales</i>                      |
| OTU00478 | -4.72 | 2.41E-04 | 2.73E-03 | <i>Moryella indoligenes</i>                     |
| OTU00124 | -4.73 | 1.78E-04 | 2.25E-03 | <i>Moryella indoligenes</i>                     |
| OTU00370 | -4.74 | 4.36E-05 | 7.55E-04 | <i>Moryella indoligenes</i>                     |
| OTU00062 | -4.80 | 1.94E-04 | 2.30E-03 | <i>Oribacterium</i>                             |
| OTU00157 | -5.04 | 8.18E-05 | 1.32E-03 | <i>Oribacterium</i>                             |
| OTU00090 | -5.23 | 1.53E-06 | 4.56E-05 | <i>Moryella indoligenes</i>                     |
| OTU00622 | -5.35 | 1.10E-04 | 1.66E-03 | <i>Candidatus_Phytoplasma<br/>witches-broom</i> |
| OTU06246 | -5.52 | 1.97E-04 | 2.30E-03 | <i>Ruminococcus</i>                             |
| OTU00514 | -5.54 | 1.06E-06 | 3.53E-05 | <i>Dorea</i>                                    |
| OTU00106 | -5.85 | 1.26E-08 | 1.17E-06 | <i>uncl. Rikenellaceae</i>                      |
| OTU00329 | -5.99 | 1.48E-05 | 2.87E-04 | <i>Ruminococcus gnavus</i>                      |
| OTU00428 | -6.13 | 1.26E-04 | 1.84E-03 | <i>uncl. HDB_SIOH1004</i>                       |
| OTU00071 | -6.58 | 1.02E-05 | 2.28E-04 | <i>uncl. S24-7</i>                              |
| OTU00149 | -6.61 | 7.15E-07 | 2.64E-05 | <i>Moryella indoligenes</i>                     |
| OTU00303 | -6.93 | 3.68E-07 | 1.72E-05 | <i>Moryella indoligenes</i>                     |
| OTU00556 | -7.21 | 1.56E-06 | 4.56E-05 | <i>uncl. S24-7</i>                              |
| OTU05059 | -7.21 | 3.17E-08 | 2.30E-06 | <i>uncl. Mogibacteriaceae</i>                   |
| OTU00506 | -7.25 | 8.92E-09 | 1.04E-06 | <i>Moryella indoligenes</i>                     |
| OTU03118 | -7.27 | 4.01E-05 | 7.20E-04 | <i>Moryella indoligenes</i>                     |
| OTU00857 | -7.34 | 7.35E-07 | 2.64E-05 | <i>Candidatus_Phytoplasma solani</i>            |
| OTU00534 | -7.40 | 5.13E-06 | 1.20E-04 | <i>Odoribacter</i>                              |
| OTU00178 | -7.67 | 3.74E-06 | 9.70E-05 | <i>uncl. S24-7</i>                              |
| OTU00586 | -7.80 | 1.30E-15 | 3.03E-13 | <i>Roseburia</i>                                |
| OTU00269 | -8.01 | 2.18E-05 | 4.08E-04 | <i>Ruminococcus gnavus</i>                      |
| OTU00377 | -8.17 | 2.28E-07 | 1.18E-05 | <i>Candidatus_Phytoplasma<br/>witches-broom</i> |
| OTU01385 | -8.23 | 8.30E-17 | 3.88E-14 | <i>Ruminococcus gnavus</i>                      |
| OTU00298 | -8.30 | 6.15E-07 | 2.61E-05 | <i>uncl. S24-7</i>                              |

**Table S3 Differential OTUs between mice with Inflammation and cancer**

| <b>OTU</b>   | <b>logFC</b> | <b>P-Value</b> | <b>FDR</b> | <b>Taxonomy</b>                     |
|--------------|--------------|----------------|------------|-------------------------------------|
| OTU0002<br>3 | 8.52         | 1.71E-05       | 3.19E-03   | <i>uncl. S24-7</i>                  |
| OTU0002<br>4 | -4.46        | 2.11E-04       | 2.35E-02   | <i>Bacteroides</i>                  |
| OTU0049<br>1 | -5.43        | 3.68E-05       | 5.13E-03   | <i>uncl. Erysipelotrichaceae</i>    |
| OTU0221<br>0 | -6.00        | 4.52E-04       | 2.99E-02   | <i>uncl. Christensenellaceae</i>    |
| OTU0020<br>7 | -7.54        | 4.83E-04       | 2.99E-02   | <i>uncl. YS2</i>                    |
| OTU0378<br>1 | -8.10        | 3.15E-04       | 2.51E-02   | <i>uncl. Rikenellaceae</i>          |
| OTU0707<br>5 | -8.20        | 7.59E-04       | 4.24E-02   | <i>Faecalibacterium prausnitzii</i> |
| OTU0019<br>9 | -8.45        | 5.29E-07       | 2.95E-04   | <i>Prevotella</i>                   |
| OTU0172<br>6 | -9.67        | 2.85E-04       | 2.51E-02   | <i>Flavobacterium succinicans</i>   |
| OTU0035<br>4 | -10.84       | 1.59E-06       | 4.43E-04   | <i>uncl. S24-7</i>                  |

**Table S4 Differential OTUs after treatment of different AOM/DSS cycles**

| <b>OTU</b> | <b>log FC</b> | <b>PValue</b> | <b>FDR</b> | <b>AOM/DSS_cycle</b> | <b>Taxonomy</b>                      |
|------------|---------------|---------------|------------|----------------------|--------------------------------------|
| OTU00354   | 10.61         | 1.12E-10      | 3.21E-08   | AOM/DSS cycle1       | <i>uncl. S24-7</i>                   |
| OTU00199   | 9.60          | 3.11E-13      | 1.78E-10   | AOM/DSS cycle1       | <i>Prevotella</i>                    |
| OTU03295   | 9.57          | 1.63E-07      | 1.86E-05   | AOM/DSS cycle1       | <i>Allobaculum</i>                   |
| OTU03781   | 8.77          | 2.82E-07      | 2.69E-05   | AOM/DSS cycle1       | <i>uncl. Rikenellaceae</i>           |
| OTU00240   | 8.31          | 1.47E-08      | 2.10E-06   | AOM/DSS cycle1       | <i>AF12</i>                          |
| OTU07075   | 8.09          | 9.57E-06      | 6.85E-04   | AOM/DSS cycle1       | <i>Faecalibacterium prausnitzii</i>  |
| OTU01228   | 6.96          | 3.33E-05      | 1.73E-03   | AOM/DSS cycle1       | <i>Allobaculum</i>                   |
| OTU26030   | 6.92          | 1.91E-05      | 1.09E-03   | AOM/DSS cycle1       | <i>02d06</i>                         |
| OTU00491   | 6.91          | 3.80E-09      | 7.25E-07   | AOM/DSS cycle1       | <i>uncl. Erysipelotrichaceae</i>     |
| OTU00728   | 6.83          | 2.26E-06      | 1.85E-04   | AOM/DSS cycle1       | <i>Wandonia</i>                      |
| OTU01187   | 6.02          | 1.81E-04      | 7.96E-03   | AOM/DSS cycle1       | <i>uncl. S24-7</i>                   |
| OTU00276   | 5.66          | 2.79E-04      | 1.11E-02   | AOM/DSS cycle1       | <i>Anaerostipes</i>                  |
| OTU00358   | 5.65          | 5.00E-05      | 2.39E-03   | AOM/DSS cycle1       | <i>Odoribacter</i>                   |
| OTU00406   | 4.40          | 1.74E-05      | 1.09E-03   | AOM/DSS cycle1       | <i>Oscillospira</i>                  |
| OTU00161   | 4.15          | 1.10E-03      | 3.61E-02   | AOM/DSS cycle1       | <i>Candidatus_Phytoplasma solani</i> |
| OTU00266   | 4.14          | 1.13E-03      | 3.61E-02   | AOM/DSS cycle1       | <i>Butyrivibrio</i>                  |
| OTU00586   | -7.67         | 3.88E-04      | 1.39E-02   | AOM/DSS cycle1       | <i>Roseburia</i>                     |
| OTU00019   | -7.87         | 1.36E-03      | 4.11E-02   | AOM/DSS cycle1       | <i>Prevotella</i>                    |
| OTU01385   | -8.02         | 2.91E-04      | 1.11E-02   | AOM/DSS cycle1       | <i>Ruminococcus gnavus</i>           |
| OTU00679   | 13.98         | 1.89E-08      | 5.43E-06   | AOM/DSS cycle2       | <i>Parabacteroides distasonis</i>    |
| OTU00117   | 13.40         | 8.25E-06      | 5.25E-04   | AOM/DSS cycle2       | <i>Bacteroides uniformis</i>         |
| OTU00147   | 13.25         | 3.50E-06      | 2.80E-04   | AOM/DSS cycle2       | <i>Parabacteroides distasonis</i>    |
| OTU00491   | 9.96          | 3.69E-15      | 2.11E-12   | AOM/DSS cycle2       | <i>uncl. Erysipelotrichaceae</i>     |
| OTU00515   | 8.90          | 3.90E-06      | 2.80E-04   | AOM/DSS cycle2       | <i>uncl. S24-7</i>                   |
| OTU07948   | 8.44          | 2.71E-06      | 2.59E-04   | AOM/DSS cycle2       | <i>Salinispora tropica</i>           |
| OTU00063   | 7.80          | 1.47E-05      | 8.40E-04   | AOM/DSS cycle2       | <i>uncl. S24-7</i>                   |
| OTU00047   | 7.57          | 5.89E-07      | 1.12E-04   | AOM/DSS cycle2       | <i>uncl. S24-7</i>                   |
| OTU02685   | 7.56          | 5.90E-05      | 2.82E-03   | AOM/DSS cycle2       | <i>uncl. S24-7</i>                   |
| OTU00728   | 6.90          | 1.79E-06      | 2.05E-04   | AOM/DSS cycle2       | <i>Wandonia</i>                      |
| OTU01105   | 6.76          | 3.71E-04      | 1.42E-02   | AOM/DSS cycle2       | <i>uncl. S24-7</i>                   |
| OTU01726   | 6.65          | 5.09E-04      | 1.72E-02   | AOM/DSS cycle2       | <i>Flavobacterium succinicans</i>    |
| OTU03598   | 6.18          | 4.84E-04      | 1.72E-02   | AOM/DSS cycle2       | <i>uncl. Ruminococcaceae</i>         |
| OTU01207   | 6.16          | 1.45E-04      | 6.41E-03   | AOM/DSS cycle2       | <i>Ruminococcus callidus</i>         |
| OTU00024   | 5.79          | 1.22E-06      | 1.75E-04   | AOM/DSS cycle2       | <i>Bacteroides</i>                   |
| OTU00218   | 5.30          | 1.04E-03      | 2.84E-02   | AOM/DSS cycle2       | <i>Ruminococcus</i>                  |
| OTU00363   | 5.09          | 9.41E-04      | 2.74E-02   | AOM/DSS cycle2       | <i>Bacteroides ovatus</i>            |
| OTU00111   | 4.47          | 1.38E-03      | 3.43E-02   | AOM/DSS cycle2       | <i>Ruminococcus</i>                  |
| OTU00168   | 4.27          | 1.28E-03      | 3.34E-02   | AOM/DSS cycle2       | <i>Lachnospira</i>                   |
| OTU00260   | 4.17          | 2.15E-03      | 4.53E-02   | AOM/DSS cycle2       | <i>uncl. S24-7</i>                   |
| OTU00174   | 3.93          | 2.47E-03      | 4.72E-02   | AOM/DSS cycle2       | <i>Moryella indoligenes</i>          |

|          |        |          |          |                |                                                                              |
|----------|--------|----------|----------|----------------|------------------------------------------------------------------------------|
| OTU00266 | 3.89   | 2.29E-03 | 4.53E-02 | AOM/DSS cycle2 | <i>Butyrivibrio</i>                                                          |
| OTU00838 | -5.02  | 2.24E-03 | 4.53E-02 | AOM/DSS cycle2 | <i>uncl. Ruminococcaceae</i>                                                 |
| OTU00048 | -7.32  | 2.20E-03 | 4.53E-02 | AOM/DSS cycle2 | <i>Rikenella</i>                                                             |
| OTU00190 | -7.42  | 2.13E-03 | 4.53E-02 | AOM/DSS cycle2 | <i>Faecalibacterium prausnitzii</i>                                          |
| OTU01385 | -8.02  | 2.99E-04 | 1.23E-02 | AOM/DSS cycle2 | <i>Ruminococcus gnavus</i>                                                   |
| OTU00296 | -8.79  | 5.58E-04 | 1.78E-02 | AOM/DSS cycle2 | <i>Shuttleworthia</i>                                                        |
| OTU01528 | -10.26 | 2.00E-03 | 4.53E-02 | AOM/DSS cycle2 | <i>uncl. RF39</i>                                                            |
| OTU00926 | -10.55 | 9.55E-04 | 2.74E-02 | AOM/DSS cycle2 | <i>uncl. Rikenellaceae</i>                                                   |
| OTU00586 | -10.81 | 3.42E-05 | 1.78E-03 | AOM/DSS cycle2 | <i>Roseburia</i>                                                             |
| OTU26030 | 8.52   | 1.87E-07 | 4.83E-05 | AOM/DSS cycle3 | <i>O2d06</i>                                                                 |
| OTU00603 | 8.12   | 3.03E-05 | 1.34E-03 | AOM/DSS cycle3 | <i>Sutterella</i>                                                            |
| OTU00345 | 8.06   | 1.95E-05 | 1.09E-03 | AOM/DSS cycle3 | <i>Lachnobacterium</i>                                                       |
| OTU01105 | 7.97   | 2.66E-05 | 1.27E-03 | AOM/DSS cycle3 | <i>uncl. S24-7</i>                                                           |
| OTU00047 | 7.91   | 8.65E-08 | 4.83E-05 | AOM/DSS cycle3 | <i>uncl. S24-7</i>                                                           |
| OTU02381 | 7.80   | 7.26E-05 | 2.73E-03 | AOM/DSS cycle3 | <i>Lactococcus garvieae</i>                                                  |
| OTU33993 | 7.60   | 8.24E-05 | 2.73E-03 | AOM/DSS cycle3 | <i>uncl. Ruminococcaceae</i>                                                 |
| OTU00063 | 7.59   | 1.09E-05 | 6.96E-04 | AOM/DSS cycle3 | <i>uncl. S24-7</i>                                                           |
| OTU00515 | 7.28   | 3.64E-05 | 1.49E-03 | AOM/DSS cycle3 | <i>uncl. S24-7</i>                                                           |
| OTU00728 | 7.21   | 2.53E-07 | 4.83E-05 | AOM/DSS cycle3 | <i>Wandonia</i>                                                              |
| OTU05397 | 7.15   | 1.36E-03 | 2.60E-02 | AOM/DSS cycle3 | <i>Proteus</i>                                                               |
| OTU03063 | 7.12   | 2.61E-03 | 3.74E-02 | AOM/DSS cycle3 | <i>Faecalibacterium prausnitzii</i>                                          |
| OTU02685 | 7.05   | 7.80E-05 | 2.73E-03 | AOM/DSS cycle3 | <i>uncl. S24-7</i>                                                           |
| OTU00616 | 6.68   | 1.46E-04 | 4.40E-03 | AOM/DSS cycle3 | <i>Anaerostipes</i>                                                          |
| OTU00240 | 6.41   | 1.72E-06 | 1.97E-04 | AOM/DSS cycle3 | <i>AF12</i>                                                                  |
| OTU00276 | 6.40   | 2.10E-05 | 1.09E-03 | AOM/DSS cycle3 | <i>Anaerostipes</i>                                                          |
| OTU00218 | 5.48   | 3.46E-04 | 8.45E-03 | AOM/DSS cycle3 | <i>Ruminococcus</i>                                                          |
| OTU25014 | 5.46   | 1.70E-03 | 2.78E-02 | AOM/DSS cycle3 | <i>uncl. RF39</i>                                                            |
| OTU01207 | 5.45   | 3.43E-04 | 8.45E-03 | AOM/DSS cycle3 | <i>Ruminococcus callidus</i>                                                 |
| OTU01356 | 5.37   | 1.52E-03 | 2.71E-02 | AOM/DSS cycle3 | <i>Faecalibacterium prausnitzii</i>                                          |
| OTU00973 | 5.17   | 1.62E-03 | 2.78E-02 | AOM/DSS cycle3 | <i>uncl. Rikenellaceae</i>                                                   |
| OTU00260 | 5.01   | 8.56E-05 | 2.73E-03 | AOM/DSS cycle3 | <i>uncl. S24-7</i>                                                           |
| OTU00082 | 4.91   | 9.22E-07 | 1.32E-04 | AOM/DSS cycle3 | <i>Bacteroides uniformis</i>                                                 |
| OTU00491 | 4.77   | 8.31E-06 | 5.95E-04 | AOM/DSS cycle3 | <i>uncl. Erysipelotrichaceae</i>                                             |
| OTU00130 | 4.46   | 8.40E-04 | 1.87E-02 | AOM/DSS cycle3 | <i>Rickettsia</i><br><i>Rickettsia_endosymbiont_of_Deronectes_platynotus</i> |
| OTU00101 | 4.36   | 1.08E-03 | 2.15E-02 | AOM/DSS cycle3 | <i>uncl. S24-7</i>                                                           |
| OTU00111 | 4.33   | 8.47E-04 | 1.87E-02 | AOM/DSS cycle3 | <i>Ruminococcus</i>                                                          |
| OTU00234 | 3.65   | 3.81E-03 | 4.75E-02 | AOM/DSS cycle3 | <i>uncl. S24-7</i>                                                           |
| OTU00083 | 3.24   | 3.65E-03 | 4.75E-02 | AOM/DSS cycle3 | <i>Ruminococcus gnavus</i>                                                   |
| OTU00107 | 3.19   | 1.92E-03 | 2.97E-02 | AOM/DSS cycle3 | <i>uncl. S24-7</i>                                                           |

|          |       |          |          |                |                                     |
|----------|-------|----------|----------|----------------|-------------------------------------|
| OTU00135 | -4.27 | 3.95E-03 | 4.82E-02 | AOM/DSS cycle3 | <i>uncl. Lachnospiraceae</i>        |
| OTU00010 | -4.34 | 1.65E-03 | 2.78E-02 | AOM/DSS cycle3 | <i>uncl. Rikenellaceae</i>          |
| OTU00296 | -5.84 | 9.67E-04 | 2.05E-02 | AOM/DSS cycle3 | <i>Shuttleworthia</i>               |
| OTU00926 | -6.33 | 2.61E-03 | 3.74E-02 | AOM/DSS cycle3 | <i>uncl. Rikenellaceae</i>          |
| OTU00106 | -6.68 | 3.11E-04 | 8.45E-03 | AOM/DSS cycle3 | <i>uncl. Rikenellaceae</i>          |
| OTU00019 | -6.85 | 3.54E-04 | 8.45E-03 | AOM/DSS cycle3 | <i>Prevotella</i>                   |
| OTU00090 | -6.91 | 1.09E-03 | 2.15E-02 | AOM/DSS cycle3 | <i>Moryella indoligenes</i>         |
| OTU02210 | -6.99 | 2.48E-03 | 3.74E-02 | AOM/DSS cycle3 | <i>uncl. Christensenellaceae</i>    |
| OTU00149 | -7.34 | 4.19E-03 | 5.00E-02 | AOM/DSS cycle3 | <i>Moryella indoligenes</i>         |
| OTU00124 | -7.38 | 3.81E-03 | 4.75E-02 | AOM/DSS cycle3 | <i>Moryella indoligenes</i>         |
| OTU01140 | -7.38 | 3.65E-03 | 4.75E-02 | AOM/DSS cycle3 | <i>Moryella indoligenes</i>         |
| OTU02602 | -7.40 | 1.41E-03 | 2.61E-02 | AOM/DSS cycle3 | <i>Coprococcus catus</i>            |
| OTU01904 | -7.70 | 3.78E-03 | 4.75E-02 | AOM/DSS cycle3 | <i>Moryella indoligenes</i>         |
| OTU00952 | -8.35 | 2.69E-03 | 3.75E-02 | AOM/DSS cycle3 | <i>Moryella indoligenes</i>         |
| OTU01385 | -8.54 | 5.07E-06 | 4.15E-04 | AOM/DSS cycle3 | <i>Ruminococcus gnavus</i>          |
| OTU00506 | -8.76 | 2.13E-04 | 6.11E-03 | AOM/DSS cycle3 | <i>Moryella indoligenes</i>         |
| OTU00586 | -8.93 | 3.00E-06 | 2.86E-04 | AOM/DSS cycle3 | <i>Roseburia</i>                    |
| OTU00282 | -9.73 | 1.88E-03 | 2.97E-02 | AOM/DSS cycle3 | <i>cc_115</i>                       |
| OTU26030 | 8.83  | 5.26E-08 | 1.51E-05 | AOM/DSS cycle4 | <i>02d06</i>                        |
| OTU00345 | 8.51  | 5.97E-06 | 4.88E-04 | AOM/DSS cycle4 | <i>Lachnobacterium</i>              |
| OTU00047 | 8.05  | 3.16E-08 | 1.51E-05 | AOM/DSS cycle4 | <i>uncl. S24-7</i>                  |
| OTU00063 | 7.96  | 3.27E-06 | 3.12E-04 | AOM/DSS cycle4 | <i>uncl. S24-7</i>                  |
| OTU00957 | 7.20  | 3.18E-04 | 7.01E-03 | AOM/DSS cycle4 | <i>Moryella indoligenes</i>         |
| OTU00728 | 7.20  | 1.37E-07 | 2.62E-05 | AOM/DSS cycle4 | <i>Wandonia</i>                     |
| OTU01105 | 6.85  | 1.24E-04 | 5.08E-03 | AOM/DSS cycle4 | <i>uncl. S24-7</i>                  |
| OTU00515 | 6.72  | 6.67E-05 | 3.19E-03 | AOM/DSS cycle4 | <i>uncl. S24-7</i>                  |
| OTU03598 | 6.53  | 8.58E-05 | 3.78E-03 | AOM/DSS cycle4 | <i>uncl. Ruminococcaceae</i>        |
| OTU02685 | 6.20  | 2.23E-04 | 5.89E-03 | AOM/DSS cycle4 | <i>uncl. S24-7</i>                  |
| OTU01207 | 6.18  | 3.83E-05 | 2.00E-03 | AOM/DSS cycle4 | <i>Ruminococcus callidus</i>        |
| OTU00675 | 6.14  | 2.33E-04 | 5.89E-03 | AOM/DSS cycle4 | <i>Moryella indoligenes</i>         |
| OTU02381 | 5.90  | 1.06E-03 | 1.41E-02 | AOM/DSS cycle4 | <i>Lactococcus garvieae</i>         |
| OTU33993 | 5.79  | 1.04E-03 | 1.41E-02 | AOM/DSS cycle4 | <i>uncl. Ruminococcaceae</i>        |
| OTU00549 | 5.75  | 6.96E-04 | 1.14E-02 | AOM/DSS cycle4 | <i>Moryella indoligenes</i>         |
| OTU01356 | 5.75  | 5.11E-04 | 9.16E-03 | AOM/DSS cycle4 | <i>Faecalibacterium prausnitzii</i> |
| OTU00471 | 5.50  | 4.22E-04 | 8.57E-03 | AOM/DSS cycle4 | <i>Ruminococcus gnavus</i>          |
| OTU00973 | 5.30  | 8.45E-04 | 1.25E-02 | AOM/DSS cycle4 | <i>uncl. Rikenellaceae</i>          |
| OTU01029 | 5.07  | 1.75E-03 | 2.01E-02 | AOM/DSS cycle4 | <i>uncl. Rikenellaceae</i>          |
| OTU00302 | 4.75  | 2.58E-04 | 6.15E-03 | AOM/DSS cycle4 | <i>Coprococcus</i>                  |
| OTU00111 | 4.71  | 1.74E-04 | 5.89E-03 | AOM/DSS cycle4 | <i>Ruminococcus</i>                 |
| OTU00200 | 4.44  | 2.15E-04 | 5.89E-03 | AOM/DSS cycle4 | <i>Moryella indoligenes</i>         |
| OTU00174 | 4.23  | 2.22E-04 | 5.89E-03 | AOM/DSS cycle4 | <i>Moryella indoligenes</i>         |
| OTU00082 | 4.06  | 1.69E-05 | 1.07E-03 | AOM/DSS cycle4 | <i>Bacteroides uniformis</i>        |
| OTU00058 | 3.86  | 6.86E-04 | 1.14E-02 | AOM/DSS cycle4 | <i>Moryella indoligenes</i>         |

|          |       |          |          |                |                                  |
|----------|-------|----------|----------|----------------|----------------------------------|
| OTU00260 | 3.70  | 1.93E-03 | 2.17E-02 | AOM/DSS cycle4 | <i>uncl. S24-7</i>               |
| OTU00059 | 3.67  | 2.89E-04 | 6.63E-03 | AOM/DSS cycle4 | <i>Coprococcus</i>               |
| OTU00135 | -3.89 | 2.03E-03 | 2.24E-02 | AOM/DSS cycle4 | <i>uncl. Lachnospiraceae</i>     |
| OTU00090 | -4.59 | 4.68E-03 | 4.00E-02 | AOM/DSS cycle4 | <i>Moryella indoligenes</i>      |
| OTU01193 | -5.95 | 1.55E-03 | 1.89E-02 | AOM/DSS cycle4 | <i>Shuttleworthia</i>            |
| OTU00052 | -6.04 | 4.35E-03 | 3.83E-02 | AOM/DSS cycle4 | <i>uncl. S24-7</i>               |
| OTU00610 | -6.05 | 4.83E-03 | 4.01E-02 | AOM/DSS cycle4 | <i>uncl. Erysipelotrichaceae</i> |
| OTU00514 | -6.12 | 1.22E-03 | 1.56E-02 | AOM/DSS cycle4 | <i>Dorea</i>                     |
| OTU00420 | -6.30 | 5.25E-03 | 4.19E-02 | AOM/DSS cycle4 | <i>Desulfovibrio D168</i>        |
| OTU03780 | -6.48 | 9.14E-04 | 1.31E-02 | AOM/DSS cycle4 | <i>Ethanoligenens</i>            |
| OTU00478 | -6.51 | 2.75E-03 | 2.67E-02 | AOM/DSS cycle4 | <i>Moryella indoligenes</i>      |
| OTU00106 | -6.68 | 3.33E-05 | 1.91E-03 | AOM/DSS cycle4 | <i>uncl. Rikenellaceae</i>       |
| OTU00329 | -6.71 | 3.23E-03 | 3.03E-02 | AOM/DSS cycle4 | <i>Ruminococcus gnavus</i>       |
| OTU05059 | -6.71 | 6.95E-04 | 1.14E-02 | AOM/DSS cycle4 | <i>uncl. Mogibacteriaceae</i>    |
| OTU00157 | -6.71 | 2.27E-03 | 2.41E-02 | AOM/DSS cycle4 | <i>Oribacterium</i>              |
| OTU00025 | -6.84 | 4.34E-04 | 8.57E-03 | AOM/DSS cycle4 | <i>uncl. S24-7</i>               |
| OTU00051 | -6.97 | 1.93E-04 | 5.89E-03 | AOM/DSS cycle4 | <i>uncl. S24-7</i>               |
| OTU02210 | -6.99 | 4.95E-04 | 9.14E-03 | AOM/DSS cycle4 | <i>uncl. Christensenellaceae</i> |
| OTU00149 | -7.00 | 1.41E-03 | 1.76E-02 | AOM/DSS cycle4 | <i>Moryella indoligenes</i>      |
| OTU00303 | -7.05 | 2.34E-03 | 2.44E-02 | AOM/DSS cycle4 | <i>Moryella indoligenes</i>      |
| OTU02545 | -7.06 | 5.22E-03 | 4.19E-02 | AOM/DSS cycle4 | <i>uncl. S24-7</i>               |
| OTU00926 | -7.09 | 2.07E-04 | 5.89E-03 | AOM/DSS cycle4 | <i>uncl. Rikenellaceae</i>       |
| OTU00506 | -7.18 | 1.59E-04 | 5.89E-03 | AOM/DSS cycle4 | <i>Moryella indoligenes</i>      |
| OTU01528 | -7.19 | 4.09E-04 | 8.57E-03 | AOM/DSS cycle4 | <i>uncl. RF39</i>                |
| OTU00586 | -7.21 | 1.57E-06 | 1.80E-04 | AOM/DSS cycle4 | <i>Roseburia</i>                 |
| OTU00062 | -7.25 | 1.12E-03 | 1.45E-02 | AOM/DSS cycle4 | <i>Oribacterium</i>              |
| OTU01140 | -7.38 | 8.14E-04 | 1.25E-02 | AOM/DSS cycle4 | <i>Moryella indoligenes</i>      |
| OTU02602 | -7.40 | 2.36E-04 | 5.89E-03 | AOM/DSS cycle4 | <i>Coprococcus catus</i>         |
| OTU00068 | -7.45 | 7.49E-04 | 1.19E-02 | AOM/DSS cycle4 | <i>uncl. Bacteroidales</i>       |
| OTU00978 | -7.47 | 2.40E-03 | 2.46E-02 | AOM/DSS cycle4 | <i>Roseburia faecis</i>          |
| OTU02315 | -7.51 | 4.76E-03 | 4.01E-02 | AOM/DSS cycle4 | <i>uncl. RF39</i>                |
| OTU00556 | -7.53 | 3.34E-03 | 3.09E-02 | AOM/DSS cycle4 | <i>uncl. S24-7</i>               |
| OTU20801 | -7.55 | 4.14E-03 | 3.71E-02 | AOM/DSS cycle4 | <i>uncl. RF39</i>                |
| OTU01761 | -7.58 | 2.82E-03 | 2.69E-02 | AOM/DSS cycle4 | <i>uncl. RF39</i>                |
| OTU00048 | -7.59 | 1.14E-05 | 8.17E-04 | AOM/DSS cycle4 | <i>Rikenella</i>                 |
| OTU00036 | -7.62 | 2.52E-03 | 2.53E-02 | AOM/DSS cycle4 | <i>uncl. Bacteroidales</i>       |
| OTU00389 | -7.65 | 2.23E-03 | 2.41E-02 | AOM/DSS cycle4 | <i>uncl. Bacteroidales</i>       |
| OTU01904 | -7.70 | 8.49E-04 | 1.25E-02 | AOM/DSS cycle4 | <i>Moryella indoligenes</i>      |
| OTU00178 | -7.87 | 6.17E-03 | 4.85E-02 | AOM/DSS cycle4 | <i>uncl. S24-7</i>               |
| OTU00428 | -7.92 | 5.27E-03 | 4.19E-02 | AOM/DSS cycle4 | <i>uncl. HDB_SIOH1004</i>        |
| OTU00298 | -7.94 | 3.46E-03 | 3.15E-02 | AOM/DSS cycle4 | <i>uncl. S24-7</i>               |
| OTU03160 | -7.95 | 1.72E-03 | 2.01E-02 | AOM/DSS cycle4 | <i>uncl. RF39</i>                |
| OTU01385 | -8.13 | 2.98E-07 | 4.26E-05 | AOM/DSS cycle4 | <i>Ruminococcus gnavus</i>       |



|          |            |          |          |                |                                                 |
|----------|------------|----------|----------|----------------|-------------------------------------------------|
| OTU01559 | -8.20      | 4.57E-03 | 3.97E-02 | AOM/DSS cycle4 | <i>cc_115</i>                                   |
| OTU00534 | -8.32      | 1.58E-03 | 1.89E-02 | AOM/DSS cycle4 | <i>Odoribacter</i>                              |
| OTU00857 | -8.36      | 9.53E-04 | 1.33E-02 | AOM/DSS cycle4 | <i>Candidatus_Phytoplasma solani</i>            |
| OTU00377 | -9.63      | 4.91E-04 | 9.14E-03 | AOM/DSS cycle4 | <i>Candidatus_Phytoplasma<br/>witches-broom</i> |
| OTU01192 | -10.5<br>7 | 2.66E-03 | 2.63E-02 | AOM/DSS cycle4 | <i>uncl. S24-7</i>                              |

**Table S5 OTU profiles**

| OTU      | Profile ID | Log normalize OTU relative abundance* |                  |                 |                |                 | Taxonomy                                    |
|----------|------------|---------------------------------------|------------------|-----------------|----------------|-----------------|---------------------------------------------|
|          |            | Control                               | AOM/DD S cycle 1 | AOM/DDS cycle 2 | AOMDDS cycle 3 | AOM/DDS cycle 4 |                                             |
| OTU00556 | 0          | 0                                     | -0.47            | -1.89           | -1.63          | -0.54           | <i>uncl. S24-7</i>                          |
| OTU00219 | 0          | 0                                     | -2.29            | -5.72           | -4.74          | -4.78           | <i>Moryella indoligenes</i>                 |
| OTU02192 | 0          | 0                                     | -0.43            | -0.71           | -1.17          | 0.11            | <i>uncl. Ruminococcaceae</i>                |
| OTU00057 | 0          | 0                                     | -0.71            | -0.77           | -1.14          | -0.14           | <i>Ruminococcus gnavus</i>                  |
| OTU03337 | 0          | 0                                     | -0.59            | -1.79           | -1.94          | -1.14           | <i>Ruminococcus</i>                         |
| OTU00124 | 0          | 0                                     | -4.14            | -4.13           | -5.33          | -3.96           | <i>Moryella indoligenes</i>                 |
| OTU00010 | 0          | 0                                     | -2.18            | -3.36           | -4.05          | -2.79           | <i>uncl. Rikenellaceae</i>                  |
| OTU00119 | 0          | 0                                     | -1.29            | -1.76           | -1.42          | -1.02           | <i>Coprococcus</i>                          |
| OTU00077 | 0          | 0                                     | -1               | -0.94           | -1.88          | -1.16           | <i>Coprococcus</i>                          |
| OTU00100 | 0          | 0                                     | -3.45            | -5.25           | -5.97          | -3.06           | <i>Ruminococcus gnavus</i>                  |
| OTU00035 | 0          | 0                                     | -2.06            | -1.48           | -5.85          | -0.76           | <i>uncl. S24-7</i>                          |
| OTU00048 | 1          | 0                                     | -7.09            | -6.98           | -6.35          | -7.06           | <i>Rikenella</i>                            |
| OTU00825 | 1          | 0                                     | -1.37            | -2.52           | -0.26          | -2.26           | <i>Ethanoligenens</i>                       |
| OTU00090 | 1          | 0                                     | -6.84            | -5.92           | -5.79          | -5.92           | <i>Moryella indoligenes</i>                 |
| OTU00178 | 1          | 0                                     | -1.49            | -1.23           | -1.18          | -0.81           | <i>uncl. S24-7</i>                          |
| OTU00377 | 1          | 0                                     | -4.48            | -5.67           | -4.22          | -6.29           | <i>Candidatus_Phytoplasma witches-broom</i> |
| OTU00393 | 1          | 0                                     | -3.48            | -4.61           | -3.35          | -4.65           | <i>Moryella indoligenes</i>                 |
| OTU00143 | 1          | 0                                     | -0.77            | -1.39           | -0.78          | -1.06           | <i>Ruminococcus gnavus</i>                  |
| OTU00062 | 2          | 0                                     | -3.07            | -1.69           | -1.96          | -2.26           | <i>Oribacterium</i>                         |
| OTU00068 | 2          | 0                                     | -5.95            | -5.33           | -5.39          | -5.98           | <i>uncl. Bacteroidales</i>                  |
| OTU00157 | 2          | 0                                     | -1.62            | -0.71           | -0.93          | -1.46           | <i>Oribacterium</i>                         |
| OTU00071 | 2          | 0                                     | -1.01            | -0.5            | -0.83          | -1.21           | <i>uncl. S24-7</i>                          |
| OTU00191 | 2          | 0                                     | -7.04            | -4.73           | -6.39          | -5.89           | <i>cc_115</i>                               |
| OTU00036 | 2          | 0                                     | -8.43            | -4.55           | -6.56          | -6.81           | <i>uncl. Bacteroidales</i>                  |
| OTU00042 | 3          | 0                                     | -1.86            | -1.11           | -0.67          | -0.28           | <i>uncl. S24-7</i>                          |
| OTU03324 | 3          | 0                                     | -0.16            | -0.71           | 0.39           | 0.72            | <i>uncl. Christensenellaceae</i>            |
| OTU00136 | 3          | 0                                     | -3.14            | -1.33           | -0.96          | -0.32           | <i>uncl. S24-7</i>                          |
| OTU00002 | 3          | 0                                     | -1.09            | -0.49           | 0.32           | 0.85            | <i>uncl. S24-7</i>                          |
| OTU00065 | 3          | 0                                     | 0.01             | -1.14           | 0.42           | 1.92            | <i>Ruminococcus gnavus</i>                  |
| OTU02149 | 3          | 0                                     | -1.15            | -0.27           | -0.36          | 0.1             | <i>Adlercreutzia</i>                        |
| OTU00023 | 3          | 0                                     | -5.62            | -5.41           | 1.28           | 3.02            | <i>uncl. S24-7</i>                          |
| OTU00851 | 3          | 0                                     | -0.11            | -0.59           | 0.5            | 1.06            | <i>Moryella indoligenes</i>                 |
| OTU01282 | 3          | 0                                     | -0.86            | -0.01           | -0.24          | 0.56            | <i>Ethanoligenens</i>                       |
| OTU00140 | 3          | 0                                     | -2.29            | -0.35           | 1.42           | 1.85            | <i>uncl. S24-7</i>                          |
| OTU00441 | 4          | 0                                     | -2.08            | -0.66           | -0.14          | -1.02           | <i>Oribacterium</i>                         |
| OTU00182 | 4          | 0                                     | -3.58            | -0.01           | 0.22           | -1.78           | <i>Candidatus_Phytoplasma witches-broom</i> |
| OTU25185 | 4          | 0                                     | -2.74            | 0.45            | 0.4            | -0.06           | <i>uncl. Peptococcaceae</i>                 |
| OTU00413 | 4          | 0                                     | -2.68            | -0.34           | -0.4           | -0.16           | <i>Oscillospira</i>                         |
| OTU00026 | 4          | 0                                     | -2.33            | -0.84           | -0.36          | -0.27           | <i>uncl. S24-7</i>                          |
| OTU00237 | 4          | 0                                     | -7.35            | -1.19           | 0.55           | -2.7            | <i>Ruminococcus</i>                         |
| OTU00270 | 4          | 0                                     | -2.44            | 0.12            | -0.71          | -0.59           | <i>uncl. S24-7</i>                          |
| OTU00263 | 4          | 0                                     | -2.87            | 0.56            | 0.55           | -0.28           | <i>uncl. OPB3</i>                           |
| OTU00714 | 4          | 0                                     | -1.73            | 0.15            | 1.01           | -1.17           | <i>Ruminococcus</i>                         |
| OTU00329 | 4          | 0                                     | -1.45            | 0.5             | 0.22           | -0.37           | <i>Ruminococcus gnavus</i>                  |
| OTU00817 | 4          | 0                                     | -4.47            | 0.7             | -1.27          | -1.81           | <i>Persicobacter diffluens</i>              |
| OTU00044 | 5          | 0                                     | -0.55            | -0.4            | -1.54          | -1.52           | <i>Candidatus_Phytoplasma witches-broom</i> |
| OTU00135 | 5          | 0                                     | -2.12            | -2.07           | -3.93          | -3.84           | <i>uncl. Lachnospiraceae</i>                |

|          |    |   |       |       |       |       |                                                                    |
|----------|----|---|-------|-------|-------|-------|--------------------------------------------------------------------|
| OTU00514 | 5  | 0 | -0.74 | -3.93 | -3.45 | -3.5  | <i>Dorea</i>                                                       |
| OTU00428 | 5  | 0 | -0.8  | -1.54 | -3.79 | -4.83 | <i>uncl. HDB_SIOH1004</i>                                          |
| OTU00052 | 5  | 0 | -0.41 | 0.19  | -4.29 | -5.84 | <i>uncl. S24-7</i>                                                 |
| OTU00460 | 5  | 0 | -0.17 | -0.96 | -1.41 | -2.04 | <i>Ruminococcus gnavus</i>                                         |
| OTU00069 | 5  | 0 | 3.02  | -2.33 | -6.17 | -5.52 | <i>uncl. S24-7</i>                                                 |
| OTU00029 | 5  | 0 | 0.14  | -7.06 | -6.33 | -7.22 | <i>uncl. S24-7</i>                                                 |
| OTU00153 | 5  | 0 | 0.37  | -2.01 | -1.68 | -2.56 | <i>Moryella indoligenes</i>                                        |
| OTU00076 | 5  | 0 | -0.14 | -0.79 | -1.46 | -1.32 | <i>Lactobacillus</i>                                               |
| OTU00215 | 6  | 0 | 0.27  | -2.2  | -0.56 | 0.48  | <i>Moryella indoligenes</i>                                        |
| OTU00455 | 6  | 0 | 0.16  | -1.75 | -0.8  | 0.37  | <i>uncl. SJA-15</i>                                                |
| OTU00126 | 6  | 0 | -2.03 | -3.74 | -0.3  | -0.47 | <i>Coprococcus</i>                                                 |
| OTU00765 | 6  | 0 | -0.2  | -6.73 | -4.43 | 0.11  | <i>Moryella indoligenes</i>                                        |
| OTU00235 | 6  | 0 | -1.56 | -2    | -2.67 | 1.58  | <i>Mucispirillum schaedleri</i>                                    |
| OTU00296 | 6  | 0 | -6.39 | -9.1  | -5.42 | -2.84 | <i>Shuttleworthia</i>                                              |
| OTU00190 | 6  | 0 | -2.48 | -6.78 | -3.57 | -2.86 | <i>Faecalibacterium prausnitzii</i>                                |
| OTU00198 | 6  | 0 | -3.37 | -4.79 | -3.61 | -1.68 | <i>uncl. Rikenellaceae</i>                                         |
| OTU00812 | 6  | 0 | -0.6  | -2.69 | -2.51 | -0.06 | <i>Coprococcus</i>                                                 |
| OTU00418 | 7  | 0 | -5.22 | -5.02 | 2.94  | -4.27 | <i>Candidatus_Phytoplasma solani</i>                               |
| OTU00223 | 7  | 0 | -0.93 | -2.55 | 0.74  | -0.37 | <i>uncl. TM7-1</i>                                                 |
| OTU00127 | 7  | 0 | -1.74 | -0.35 | 1.25  | 0.26  | <i>uncl. OPB3</i>                                                  |
| OTU00163 | 7  | 0 | -0.2  | -0.46 | 0.93  | 0.09  | <i>Oscillospira</i>                                                |
| OTU00275 | 7  | 0 | -1.93 | -1.4  | 0.82  | 0.67  | <i>Faecalibacterium prausnitzii</i>                                |
| OTU00196 | 7  | 0 | -3.47 | -4.86 | 0.22  | -1.31 | <i>Oscillospira</i>                                                |
| OTU06927 | 7  | 0 | -1.53 | -1.83 | 0.46  | 0.45  | <i>Adlercreutzia</i>                                               |
| OTU00141 | 7  | 0 | -1.45 | 0.08  | 2.14  | 0.06  | <i>Anaerotruncus</i>                                               |
| OTU00362 | 8  | 0 | -1.48 | 0.35  | -1.83 | -0.47 | <i>uncl. envOPS12</i>                                              |
| OTU00255 | 8  | 0 | -3.4  | -1.31 | -4.14 | 0.8   | <i>Coprococcus</i>                                                 |
| OTU00250 | 8  | 0 | -7.58 | -1.27 | -7.04 | -2.86 | <i>Moryella indoligenes</i>                                        |
| OTU01157 | 8  | 0 | -2.69 | 1.96  | -0.77 | 0.95  | <i>uncl. envOPS12</i>                                              |
| OTU00122 | 8  | 0 | -3.22 | 2.17  | -4.27 | 1.66  | <i>uncl. S24-7</i>                                                 |
| OTU00019 | 8  | 0 | -8.07 | -1.44 | -7.02 | -1.82 | <i>Prevotella</i>                                                  |
| OTU00236 | 8  | 0 | -5.16 | 1.35  | -5.14 | 0.87  | <i>uncl. S24-7</i>                                                 |
| OTU00278 | 8  | 0 | -0.98 | 0.45  | -2.05 | 0     | <i>Ruminococcus gnavus</i>                                         |
| OTU01764 | 9  | 0 | -0.62 | 0.08  | 0.49  | -0.78 | <i>Faecalibacterium prausnitzii</i>                                |
| OTU00130 | 9  | 0 | -2.31 | -1.1  | -1.35 | -4.52 | <i>Rickettsia Rickettsia_endosymbiont_of_Deronectes_platynotus</i> |
| OTU00305 | 9  | 0 | -0.21 | 0.53  | 0.46  | -0.72 | <i>Moryella</i>                                                    |
| OTU00360 | 10 | 0 | -0.04 | 2.26  | -0.24 | -0.98 | <i>Oscillospira</i>                                                |
| OTU00045 | 10 | 0 | -1.03 | 1.42  | -1.81 | -1.03 | <i>Moryella indoligenes</i>                                        |
| OTU00388 | 10 | 0 | -4.51 | 1.76  | -4.92 | -4.02 | <i>uncl. S24-7</i>                                                 |
| OTU00709 | 10 | 0 | -6.22 | 4.5   | -0.63 | -3.17 | <i>Anaeroplasma</i>                                                |
| OTU00099 | 10 | 0 | -0.98 | 1.38  | -2.85 | -1.27 | <i>uncl. Lachnospiraceae</i>                                       |
| OTU00093 | 10 | 0 | 0.34  | 1.91  | -0.91 | -0.49 | <i>Ruminococcus gnavus</i>                                         |
| OTU01779 | 10 | 0 | -0.94 | 3.98  | 0.7   | -0.64 | <i>Streptococcus luteciae</i>                                      |
| OTU00056 | 10 | 0 | -1.53 | 0.82  | -1.86 | -1.28 | <i>Oribacterium</i>                                                |
| OTU00125 | 10 | 0 | -0.46 | 2.57  | -0.31 | -2.82 | <i>Moryella indoligenes</i>                                        |
| OTU00160 | 10 | 0 | -0.25 | 1.68  | -1.96 | -0.23 | <i>Ruminococcus gnavus</i>                                         |
| OTU00112 | 10 | 0 | -2.05 | 1.07  | -1.85 | -1.82 | <i>Ruminococcus</i>                                                |
| OTU02959 | 10 | 0 | -4.74 | 1.8   | -2.13 | -3.11 | <i>uncl. Enterobacteriaceae</i>                                    |
| OTU00074 | 10 | 0 | -2.15 | 3.49  | -2.6  | -1.53 | <i>uncl. Desulfovibrionaceae</i>                                   |

|          |    |   |       |       |       |       |                                      |
|----------|----|---|-------|-------|-------|-------|--------------------------------------|
| OTU00105 | 10 | 0 | -0.42 | 1.48  | -0.39 | -0.44 | <i>Oscillospira</i>                  |
| OTU00319 | 11 | 0 | -1.24 | 0.62  | 1.55  | 1.39  | <i>Bilophila</i>                     |
| OTU00176 | 11 | 0 | -3.23 | 0.6   | 1.07  | 1.55  | <i>uncl. S24-7</i>                   |
| OTU00459 | 11 | 0 | -1.24 | 0.65  | 0.57  | 0.17  | <i>Dehalobacterium</i>               |
| OTU00128 | 11 | 0 | -1.43 | 0.35  | 0.14  | 0.02  | <i>Ruminococcus</i>                  |
| OTU00011 | 11 | 0 | -0.37 | 0.73  | 2.28  | 1.48  | <i>uncl. S24-7</i>                   |
| OTU00260 | 11 | 0 | -4.25 | 4.12  | 5.44  | 3.66  | <i>uncl. S24-7</i>                   |
| OTU00060 | 11 | 0 | -5.31 | 1.66  | 3.4   | 2.99  | <i>uncl. S24-7</i>                   |
| OTU00281 | 11 | 0 | -1.47 | 2.62  | 1.71  | 1.13  | <i>uncl. Lachnospiraceae</i>         |
| OTU00284 | 11 | 0 | -2    | 1.68  | 1.76  | 1.53  | <i>Ruminococcus gnavus</i>           |
| OTU00165 | 11 | 0 | -1.3  | 2.09  | 1.12  | 0.57  | <i>Oscillospira</i>                  |
| OTU01343 | 11 | 0 | -0.27 | 1.09  | 1.49  | 0.75  | <i>Moryella indoligenes</i>          |
| OTU00113 | 11 | 0 | -0.77 | 0.27  | 0.79  | 1.19  | <i>uncl. S24-7</i>                   |
| OTU00027 | 11 | 0 | -4.01 | 0.12  | 0.56  | 0.76  | <i>uncl. S24-7</i>                   |
| OTU00239 | 11 | 0 | -6.73 | 1.47  | 0.78  | 1.89  | <i>Coprococcus</i>                   |
| OTU01093 | 11 | 0 | -0.43 | 0.84  | 1.25  | 1.12  | <i>Oscillospira</i>                  |
| OTU01891 | 11 | 0 | -1.74 | -0.02 | 0.13  | 0.59  | <i>Oscillospira</i>                  |
| OTU00299 | 11 | 0 | -2.4  | -0.4  | 0.91  | 0.52  | <i>uncl. OPB3</i>                    |
| OTU00209 | 11 | 0 | -0.76 | 0.75  | 1.57  | 0.51  | <i>Coprococcus</i>                   |
| OTU00101 | 11 | 0 | -2.7  | 4.42  | 5.51  | 3.76  | <i>uncl. S24-7</i>                   |
| OTU00038 | 11 | 0 | -4.15 | 0.15  | 0.63  | 1.58  | <i>uncl. S24-7</i>                   |
| OTU01130 | 11 | 0 | -1.45 | 1.64  | 2.73  | 2.31  | <i>uncl. Rikenellaceae</i>           |
| OTU00212 | 12 | 0 | 0.32  | -3.94 | -0.99 | -1.81 | <i>Candidatus_Phytoplasma solani</i> |
| OTU00822 | 12 | 0 | 1.51  | -3.88 | 2.03  | -0.4  | <i>uncl. RF39</i>                    |
| OTU00005 | 12 | 0 | 0.09  | -1.46 | -0.4  | -0.25 | <i>uncl. S24-7</i>                   |
| OTU00386 | 12 | 0 | 2.88  | -3.63 | 2.81  | -2.03 | <i>Candidatus_Phytoplasma</i>        |
| OTU00314 | 12 | 0 | 0.86  | -1.02 | 0.91  | 0.06  | <i>Moryella indoligenes</i>          |
| OTU00095 | 12 | 0 | 0.62  | -0.8  | 0.41  | 0.2   | <i>Coprococcus</i>                   |
| OTU00673 | 12 | 0 | -0.32 | -4.17 | -0.37 | -1.32 | <i>uncl. Erysipelotrichaceae</i>     |
| OTU03654 | 12 | 0 | 1.68  | -1.71 | 0.83  | -0.99 | <i>Coprobacillus</i>                 |
| OTU00517 | 12 | 0 | 2.93  | -5.95 | 2.75  | -2.71 | <i>Faecalibacterium prausnitzii</i>  |
| OTU00058 | 12 | 0 | 0.75  | -2.91 | 0.24  | -0.82 | <i>Moryella indoligenes</i>          |
| OTU00225 | 12 | 0 | -0.26 | -3.11 | -0.95 | -1.01 | <i>Moryella indoligenes</i>          |
| OTU00032 | 12 | 0 | 1.23  | -1.16 | 0.19  | -1.07 | <i>uncl. S24-7</i>                   |
| OTU00838 | 12 | 0 | -0.93 | -4.56 | 0.94  | 0.38  | <i>uncl. Ruminococcaceae</i>         |
| OTU06498 | 12 | 0 | 0.31  | -2.14 | 1.93  | -1.01 | <i>uncl. TM7-1</i>                   |
| OTU00017 | 12 | 0 | 0.58  | -2.06 | 0.47  | 0.75  | <i>Moryella indoligenes</i>          |
| OTU00262 | 12 | 0 | -2.32 | -6.38 | -0.73 | -2.75 | <i>Clostridium</i>                   |
| OTU00061 | 12 | 0 | -0.1  | -2.13 | 1.02  | -1.89 | <i>Lactobacillus</i>                 |
| OTU00066 | 12 | 0 | 0     | -2.8  | 0.13  | -1.89 | <i>Roseburia</i>                     |
| OTU00164 | 12 | 0 | 1.86  | -5.04 | 0.29  | -0.81 | <i>Faecalibacterium prausnitzii</i>  |
| OTU00379 | 12 | 0 | -0.1  | -2.22 | 0.81  | 0.31  | <i>uncl. Mogibacteriaceae</i>        |
| OTU00343 | 12 | 0 | 0.11  | -5.12 | 1.4   | -4.4  | <i>Candidatus_Phytoplasma solani</i> |
| OTU00025 | 12 | 0 | -0.64 | -7.38 | -1.1  | -7.31 | <i>uncl. S24-7</i>                   |
| OTU02321 | 12 | 0 | -2.16 | -5.7  | -0.89 | -2.76 | <i>Ruminococcus</i>                  |
| OTU00433 | 12 | 0 | -0.58 | -7.23 | 1.36  | -4.37 | <i>uncl. RF39</i>                    |
| OTU00804 | 12 | 0 | 1.58  | -5.67 | -2.71 | -5.51 | <i>Paenibacillus illinoisensis</i>   |
| OTU00681 | 12 | 0 | -0.06 | -1.95 | -0.6  | -1.92 | <i>cc_115</i>                        |
| OTU00297 | 12 | 0 | 0.08  | -1.94 | -0.35 | -1.01 | <i>Oscillospira</i>                  |
| OTU00039 | 12 | 0 | 3.17  | -5.65 | 0.74  | -2.73 | <i>uncl. S24-7</i>                   |

|          |    |   |       |       |       |       |                                      |
|----------|----|---|-------|-------|-------|-------|--------------------------------------|
| OTU00394 | 12 | 0 | 0.53  | -4.96 | 2.97  | 0.45  | <i>uncl. RF39</i>                    |
| OTU00088 | 12 | 0 | 0.09  | -1.74 | -0.53 | -0.37 | <i>Oscillospira</i>                  |
| OTU00085 | 12 | 0 | -0.59 | -6.11 | 0.89  | -5.9  | <i>uncl. S24-7</i>                   |
| OTU00664 | 12 | 0 | -0.32 | -1.69 | -0.32 | -0.69 | <i>Anaerofilum</i>                   |
| OTU00149 | 12 | 0 | 0.11  | -2.35 | -1.38 | -1.44 | <i>Moryella indoligenes</i>          |
| OTU00173 | 13 | 0 | 1.1   | -3.54 | 1.37  | -3.63 | <i>Candidatus_Phytoplasma solani</i> |
| OTU00300 | 13 | 0 | -0.56 | -1.1  | -0.5  | -1.85 | <i>Moryella indoligenes</i>          |
| OTU00238 | 13 | 0 | -0.6  | -2.7  | -1.22 | -2.95 | <i>Moryella indoligenes</i>          |
| OTU01176 | 13 | 0 | -0.24 | -0.97 | -0.45 | -1.66 | <i>rc4-4</i>                         |
| OTU00478 | 13 | 0 | 2.52  | -1.63 | -1.49 | -4.07 | <i>Moryella indoligenes</i>          |
| OTU00857 | 13 | 0 | -0.4  | -1.03 | 0.72  | -2.32 | <i>Candidatus_Phytoplasma solani</i> |
| OTU06707 | 13 | 0 | -0.01 | -1.6  | -0.2  | -1.94 | <i>rc4-4</i>                         |
| OTU00051 | 13 | 0 | 1.56  | -6.67 | -3.1  | -6.95 | <i>uncl. S24-7</i>                   |
| OTU00188 | 14 | 0 | -1.1  | -1.3  | -3.78 | -3.08 | <i>uncl. S24-7</i>                   |
| OTU00525 | 14 | 0 | 0.32  | -0.07 | -1.34 | -1.09 | <i>uncl. Rikenellaceae</i>           |
| OTU00773 | 14 | 0 | -0.24 | -0.31 | -1.65 | -0.04 | <i>Anaerotruncus</i>                 |
| OTU00733 | 14 | 0 | 0.26  | 0.8   | -1.77 | -0.92 | <i>Nitratireductor</i>               |
| OTU00013 | 14 | 0 | 0.4   | 0.74  | -0.5  | -0.45 | <i>Ruminococcus gnavus</i>           |
| OTU00844 | 14 | 0 | 0.09  | -0.74 | -1.5  | -0.83 | <i>Tsukamurella</i>                  |
| OTU00020 | 14 | 0 | -0.96 | -0.18 | -6.16 | -0.78 | <i>uncl. S24-7</i>                   |
| OTU00333 | 14 | 0 | -0.54 | 1.39  | -4.48 | -0.67 | <i>cc_115</i>                        |
| OTU00193 | 14 | 0 | 0.51  | 0.76  | -0.4  | -0.18 | <i>Moryella</i>                      |
| OTU00047 | 15 | 0 | -0.07 | 8.14  | 1.15  | 8.24  | <i>uncl. S24-7</i>                   |
| OTU00115 | 15 | 0 | -0.34 | 1.74  | -0.14 | 1.47  | <i>Ruminococcus gnavus</i>           |
| OTU00014 | 15 | 0 | -0.44 | 0.63  | -1.58 | 2.07  | <i>uncl. S24-7</i>                   |
| OTU00079 | 15 | 0 | -1.88 | 7.09  | 0.95  | 7.75  | <i>Odoribacter</i>                   |
| OTU00109 | 15 | 0 | -0.28 | 1.29  | 0.47  | 2.2   | <i>uncl. Ruminococcaceae</i>         |
| OTU00081 | 15 | 0 | 0     | 1.09  | -0.36 | 1.15  | <i>Moryella indoligenes</i>          |
| OTU00561 | 16 | 0 | 1.07  | 0.55  | 6     | -0.08 | <i>Ruminococcus</i>                  |
| OTU00211 | 16 | 0 | 0.41  | 1.61  | 2.42  | 0.64  | <i>uncl. S24-7</i>                   |
| OTU00216 | 16 | 0 | 1.11  | 1.56  | 2.6   | -0.26 | <i>uncl. S24-7</i>                   |
| OTU00218 | 16 | 0 | -1.36 | 7.68  | 8.08  | 0     | <i>Ruminococcus</i>                  |
| OTU00286 | 16 | 0 | -0.54 | -0.37 | 1     | -0.65 | <i>uncl. S24-7</i>                   |
| OTU00080 | 16 | 0 | 0.74  | 0.97  | 2.59  | 0.93  | <i>Desulfovibrio C21_c20</i>         |
| OTU00345 | 16 | 0 | 0.7   | 0.56  | 2.46  | 0.1   | <i>Lachnobacterium</i>               |
| OTU00103 | 16 | 0 | 0.55  | 0.56  | 2.75  | 1.37  | <i>Desulfovibrio C21_c20</i>         |
| OTU01451 | 16 | 0 | 0.75  | 1.38  | 2.07  | 0.31  | <i>Adlercreutzia</i>                 |
| OTU00034 | 16 | 0 | -0.29 | 0.23  | 0.81  | 0.1   | <i>Oscillospira</i>                  |
| OTU00813 | 16 | 0 | 0.02  | 0.83  | 1.26  | -0.22 | <i>uncl. Mogibacteriaceae</i>        |
| OTU25227 | 16 | 0 | 0.13  | -0.14 | 2.25  | -0.43 | <i>Ethanoligenens</i>                |
| OTU00449 | 17 | 0 | 3.9   | -1.02 | 0.49  | 2.03  | <i>Ruminococcus gnavus</i>           |
| OTU00366 | 17 | 0 | 0.34  | -5.59 | -3.78 | 0.45  | <i>Moryella indoligenes</i>          |
| OTU00213 | 17 | 0 | 1.98  | -2.62 | -3.87 | -3.09 | <i>Oscillospira</i>                  |
| OTU00001 | 17 | 0 | 0.83  | -0.45 | -0.55 | -0.44 | <i>uncl. Rikenellaceae</i>           |
| OTU00031 | 17 | 0 | -0.07 | -1.06 | -0.63 | -0.31 | <i>Oscillospira</i>                  |
| OTU04198 | 17 | 0 | -0.12 | -3.44 | -2.34 | -1.23 | <i>Moryella indoligenes</i>          |
| OTU01165 | 17 | 0 | 2.14  | -4.84 | -3.09 | -2.84 | <i>Blautia</i>                       |
| OTU00118 | 17 | 0 | 3.5   | 0.12  | -2.51 | 1.76  | <i>Ruminococcus gnavus</i>           |
| OTU01128 | 17 | 0 | 4.44  | -1.09 | -0.5  | -0.05 | <i>Ruminococcus</i>                  |
| OTU00330 | 17 | 0 | 3.53  | -4.24 | -2.63 | 1.54  | <i>Ruminococcus gnavus</i>           |

|          |    |   |       |       |       |       |                                     |
|----------|----|---|-------|-------|-------|-------|-------------------------------------|
| OTU00159 | 17 | 0 | 3.73  | -1.77 | 0.01  | -0.57 | <i>Coprococcus</i>                  |
| OTU00277 | 17 | 0 | 2.3   | -1.58 | -2.33 | -2.06 | <i>Oscillospira</i>                 |
| OTU00279 | 17 | 0 | -0.55 | -5.46 | -4.21 | -2.29 | <i>uncl. S24-7</i>                  |
| OTU00199 | 17 | 0 | 10.13 | -1.54 | 1.41  | 0.09  | <i>Prevotella</i>                   |
| OTU00104 | 17 | 0 | 1.72  | -0.49 | 0.32  | 0.35  | <i>Coprococcus</i>                  |
| OTU00033 | 17 | 0 | 0.7   | -1.8  | -1.55 | -0.52 | <i>uncl. Lachnospiraceae</i>        |
| OTU00030 | 17 | 0 | 1.47  | -0.27 | 0.16  | 0.42  | <i>uncl. S24-7</i>                  |
| OTU00269 | 17 | 0 | 2.04  | -2.43 | -0.95 | -0.88 | <i>Ruminococcus gnavus</i>          |
| OTU01089 | 17 | 0 | 2.43  | -4.84 | -0.36 | 1.72  | <i>Butyrivibrio</i>                 |
| OTU00040 | 18 | 0 | 2.39  | 0.76  | -0.34 | 4.08  | <i>uncl. S24-7</i>                  |
| OTU00004 | 18 | 0 | 0.24  | -0.56 | -0.75 | 0.73  | <i>uncl. S24-7</i>                  |
| OTU00098 | 18 | 0 | 1.46  | 0.52  | 0.29  | 1.36  | <i>Ruminococcus gnavus</i>          |
| OTU00097 | 18 | 0 | 0.3   | -0.52 | -0.28 | 0.59  | <i>Ruminococcus gnavus</i>          |
| OTU01605 | 18 | 0 | 1.33  | -0.32 | -1.73 | 1.74  | <i>Moryella indoligenes</i>         |
| OTU01171 | 18 | 0 | 1.63  | 0.26  | 0.24  | 1.29  | <i>uncl. Mogibacteriaceae</i>       |
| OTU00302 | 18 | 0 | 2.39  | 0.85  | 2.1   | 5.24  | <i>Coprococcus</i>                  |
| OTU00430 | 18 | 0 | 2.01  | 0.4   | 0.57  | 1.58  | <i>Ruminococcus gnavus</i>          |
| OTU00342 | 18 | 0 | 0.85  | -0.12 | -0.02 | 1.58  | <i>Ruminococcus gnavus</i>          |
| OTU00437 | 18 | 0 | 2.69  | -3.36 | 0.32  | 4.57  | <i>Moryella indoligenes</i>         |
| OTU00205 | 18 | 0 | 0.45  | -0.24 | 0.78  | 2.97  | <i>uncl. RF32</i>                   |
| OTU00249 | 18 | 0 | 2.79  | -1.8  | 0.3   | 4.49  | <i>Moryella indoligenes</i>         |
| OTU00046 | 19 | 0 | 1.04  | -0.54 | 0.31  | -0.27 | <i>uncl. S24-7</i>                  |
| OTU00041 | 19 | 0 | 4.66  | 1.09  | 2.01  | 0.21  | <i>Turicibacter</i>                 |
| OTU00183 | 19 | 0 | 3.39  | -1.73 | 0.83  | -2.21 | <i>uncl. S24-7</i>                  |
| OTU00184 | 19 | 0 | 1.79  | 1.46  | 1.92  | 0.47  | <i>Lactobacillus reuteri</i>        |
| OTU00006 | 19 | 0 | 2.08  | 1.18  | 1.49  | 0.24  | <i>Bacteroides acidifaciens</i>     |
| OTU00355 | 19 | 0 | 1.1   | 0.55  | 1.81  | 0.59  | <i>uncl. S24-7</i>                  |
| OTU00463 | 19 | 0 | 3.46  | -3.26 | 4.58  | -3.04 | <i>Faecalibacterium prausnitzii</i> |
| OTU00504 | 19 | 0 | 1     | 0.42  | 2.12  | 0.55  | <i>Oscillospira</i>                 |
| OTU00083 | 19 | 0 | 0.81  | -0.21 | 3.31  | 0.4   | <i>Ruminococcus gnavus</i>          |
| OTU00272 | 19 | 0 | 3.13  | 0.97  | 1.51  | 0.69  | <i>Moryella indoligenes</i>         |
| OTU00998 | 19 | 0 | 8.27  | 1.03  | 5.69  | -0.4  | <i>Ruminococcus gnavus</i>          |
| OTU00247 | 19 | 0 | 1.55  | 0.1   | 1.69  | 0.59  | <i>uncl. Bacteriovoraceae</i>       |
| OTU00498 | 19 | 0 | 4.24  | -0.95 | 2.12  | 0.82  | <i>Moryella indoligenes</i>         |
| OTU00861 | 19 | 0 | 0.53  | -0.09 | 0.49  | -0.5  | <i>Tepidibacter</i>                 |
| OTU00624 | 20 | 0 | 0.87  | 0.24  | 1.6   | 1.59  | <i>uncl. Ruminococcaceae</i>        |
| OTU00210 | 20 | 0 | 0.44  | -1.65 | 1.59  | 0.97  | <i>Coprococcus</i>                  |
| OTU00009 | 20 | 0 | 1.89  | 0.21  | 1.86  | 1.41  | <i>uncl. Rikenellaceae</i>          |
| OTU00312 | 20 | 0 | 3.63  | -0.74 | 2.11  | 1.74  | <i>Shuttleworthia</i>               |
| OTU01988 | 20 | 0 | 4.02  | 1.53  | 3.19  | 2.33  | <i>Adlercreutzia</i>                |
| OTU00055 | 20 | 0 | 1.43  | 0.62  | 2.54  | 2.29  | <i>uncl. S24-7</i>                  |
| OTU00540 | 20 | 0 | 2     | -3.07 | 1.81  | 1.35  | <i>Dehalobacterium</i>              |
| OTU00012 | 20 | 0 | 0.53  | -0.61 | 0.72  | 0.42  | <i>uncl. S24-7</i>                  |
| OTU00064 | 20 | 0 | 2.47  | 1.56  | 3.07  | 3.27  | <i>uncl. S24-7</i>                  |
| OTU00028 | 20 | 0 | 0.5   | -0.53 | 0.29  | 0.56  | <i>uncl. S24-7</i>                  |
| OTU00234 | 20 | 0 | 2.81  | -0.76 | 5.3   | 4.02  | <i>uncl. S24-7</i>                  |
| OTU00481 | 20 | 0 | 1.02  | -1.61 | 1.08  | 1.27  | <i>Moryella indoligenes</i>         |
| OTU01177 | 20 | 0 | 1.98  | 0.56  | 1.72  | 2.19  | <i>Ruminococcus</i>                 |
| OTU00155 | 20 | 0 | 1.82  | -1.13 | 2.08  | 1.18  | <i>Coprococcus</i>                  |
| OTU00273 | 20 | 0 | 3.09  | -2.21 | 0.48  | 2.95  | <i>Ruminococcus gnavus</i>          |

|          |    |   |       |       |       |       |                                             |
|----------|----|---|-------|-------|-------|-------|---------------------------------------------|
| OTU00294 | 20 | 0 | 2.21  | -0.32 | 3.71  | 2.45  | <i>uncl. Rikenellaceae</i>                  |
| OTU00195 | 20 | 0 | 1.23  | -2.89 | 2.73  | 4.39  | <i>Ruminococcus gnavus</i>                  |
| OTU00107 | 20 | 0 | 2.03  | 1.32  | 3.59  | 2.41  | <i>uncl. S24-7</i>                          |
| OTU00530 | 20 | 0 | 1.38  | -0.44 | 2.91  | 1.26  | <i>uncl. S24-7</i>                          |
| OTU00406 | 20 | 0 | 4.99  | -0.56 | 1.84  | 2     | <i>Oscillospira</i>                         |
| OTU02669 | 20 | 0 | 0.37  | -0.43 | 0.92  | 0.68  | <i>uncl. Christensenellaceae</i>            |
| OTU00145 | 20 | 0 | 1.36  | 0.26  | 1.02  | 1.14  | <i>Ruminococcus</i>                         |
| OTU00144 | 20 | 0 | 0.8   | 0.55  | 1.47  | 0.89  | <i>uncl. S24-7</i>                          |
| OTU03291 | 20 | 0 | 5.83  | -0.29 | 1.97  | 3.85  | <i>uncl. RF39</i>                           |
| OTU01640 | 20 | 0 | 0.77  | -1.23 | 2.5   | 0.77  | <i>Candidatus_Phytoplasma solani</i>        |
| OTU01718 | 20 | 0 | 1.68  | -1.59 | 1.69  | 1.21  | <i>uncl. Christensenellaceae</i>            |
| OTU00365 | 21 | 0 | 0.98  | 0.47  | -0.64 | 0.66  | <i>uncl. S24-7</i>                          |
| OTU00137 | 21 | 0 | 4.94  | 3.1   | -2.25 | 3.22  | <i>Moryella indoligenes</i>                 |
| OTU00559 | 21 | 0 | 0.73  | 4.27  | -2.62 | 1.12  | <i>Candidatus_Phytoplasma witches-broom</i> |
| OTU00257 | 21 | 0 | 2.91  | 0.63  | -2.52 | 2.04  | <i>Ruminococcus gnavus</i>                  |
| OTU00252 | 21 | 0 | 0.52  | 0.98  | -0.09 | 0.56  | <i>Coprococcus</i>                          |
| OTU00772 | 21 | 0 | 0.73  | 2.14  | -3.39 | 0.23  | <i>Candidatus_Arthromitus</i>               |
| OTU00871 | 21 | 0 | 2.2   | 1.3   | -0.19 | 1.19  | <i>Coprococcus</i>                          |
| OTU00054 | 21 | 0 | 0.72  | 1.89  | -0.63 | 0.92  | <i>Oscillospira</i>                         |
| OTU00229 | 21 | 0 | 2.29  | 3.34  | -0.62 | 1.64  | <i>Moryella indoligenes</i>                 |
| OTU00072 | 21 | 0 | 0.72  | 1.14  | -6.93 | 0.44  | <i>uncl. S24-7</i>                          |
| OTU00037 | 21 | 0 | 0.51  | 1.23  | -0.59 | 0.95  | <i>Blautia producta</i>                     |
| OTU00391 | 21 | 0 | 1.67  | 1.29  | -0.17 | 0.79  | <i>uncl. YS2</i>                            |
| OTU00148 | 21 | 0 | 0.68  | 1     | -0.96 | 1.69  | <i>Coprococcus</i>                          |
| OTU00003 | 22 | 0 | -0.32 | 0.61  | -0.44 | -3.58 | <i>Bacteroides</i>                          |
| OTU00175 | 22 | 0 | 0.02  | 0.54  | -0.68 | -0.95 | <i>uncl. Christensenellaceae</i>            |
| OTU00114 | 22 | 0 | 1.31  | 0.58  | 0.01  | -1.01 | <i>uncl. S24-7</i>                          |
| OTU00022 | 22 | 0 | 0.29  | 2.17  | 0.14  | -2.21 | <i>Bacteroides</i>                          |
| OTU00233 | 22 | 0 | 1.46  | 1.44  | -3.47 | -4.72 | <i>Moryella indoligenes</i>                 |
| OTU00078 | 22 | 0 | 2.83  | 0.57  | 0.65  | -1.92 | <i>Ruminococcus gnavus</i>                  |
| OTU00241 | 22 | 0 | -0.14 | 0.04  | -1.13 | -2.25 | <i>Flexithrix dorotheae</i>                 |
| OTU01061 | 23 | 0 | 5.7   | 2.86  | 3.54  | 4.11  | <i>Moryella indoligenes</i>                 |
| OTU00007 | 23 | 0 | 3.81  | 2.43  | 3.41  | 2.87  | <i>uncl. S24-7</i>                          |
| OTU00008 | 23 | 0 | 3.81  | 2.42  | 3.42  | 2.86  | <i>uncl. S24-7</i>                          |
| OTU00907 | 23 | 0 | 5.04  | 5     | 3.03  | 4.97  | <i>Lactobacillus hamsteri</i>               |
| OTU02444 | 23 | 0 | 2.02  | 1.2   | 1.75  | 2.48  | <i>Adlercreutzia</i>                        |
| OTU03300 | 23 | 0 | 1.24  | 2.02  | 1.66  | 1.81  | <i>Arthrobacter crystallopoietes</i>        |
| OTU00121 | 23 | 0 | 1.04  | 1.48  | 1.6   | 1.51  | <i>uncl. S24-7</i>                          |
| OTU01784 | 23 | 0 | 2.09  | 1.42  | 0.93  | 1.51  | <i>uncl. YS2</i>                            |
| OTU00261 | 23 | 0 | 5.08  | 3.07  | 2.67  | 4.01  | <i>Coprococcus</i>                          |
| OTU00110 | 23 | 0 | 2.92  | 4.17  | 3.72  | 2.85  | <i>uncl. S24-7</i>                          |
| OTU00021 | 23 | 0 | 1.51  | 0.95  | 1.55  | 1.48  | <i>uncl. S24-7</i>                          |
| OTU02328 | 23 | 0 | 3.44  | 3.83  | 3.17  | 3.06  | <i>uncl. S24-7</i>                          |
| OTU00152 | 23 | 0 | 1.94  | 1.48  | 1.79  | 1.98  | <i>Coprococcus</i>                          |
| OTU00070 | 23 | 0 | 3.76  | 3.03  | 3.81  | 3.39  | <i>uncl. S24-7</i>                          |
| OTU00202 | 23 | 0 | 1.59  | 2.06  | 1.11  | 1.14  | <i>Ruminococcus</i>                         |
| OTU00757 | 23 | 0 | 4.78  | 4.27  | 2.64  | 2.96  | <i>Faecalibacterium prausnitzii</i>         |
| OTU02724 | 23 | 0 | 3.15  | 2.3   | 1.97  | 2.06  | <i>uncl. Rikenellaceae</i>                  |
| OTU00082 | 23 | 0 | 4.1   | 4     | 4.31  | 4.82  | <i>Bacteroides uniformis</i>                |
| OTU00084 | 23 | 0 | 1.46  | 1.05  | 1.71  | 1.19  | <i>Oscillospira</i>                         |

|          |    |   |       |       |       |       |                                             |
|----------|----|---|-------|-------|-------|-------|---------------------------------------------|
| OTU00929 | 23 | 0 | 4.47  | 4.78  | 6.05  | 1.92  | <i>uncl. envOPS12</i>                       |
| OTU00444 | 24 | 0 | 4.03  | 4.53  | 1.46  | 1.31  | <i>Ruminococcus</i>                         |
| OTU00318 | 24 | 0 | 1.1   | 1.45  | 0.67  | 0.41  | <i>Moryella</i>                             |
| OTU00875 | 24 | 0 | 1     | 4.22  | 0.81  | -0.82 | <i>cc_115</i>                               |
| OTU00639 | 24 | 0 | 0.88  | 2.07  | 0.57  | -0.13 | <i>Candidatus_Phytoplasma witches-broom</i> |
| OTU00120 | 24 | 0 | 1.21  | 2.34  | 0.13  | -0.42 | <i>Helicobacter hepaticus</i>               |
| OTU01837 | 24 | 0 | 3.42  | 3.45  | 1.87  | 0.77  | <i>uncl. HDB_SIOH1004</i>                   |
| OTU00280 | 24 | 0 | 1.95  | 3.47  | 0.67  | 0.37  | <i>Oribacterium</i>                         |
| OTU00024 | 24 | 0 | 3.51  | 6.48  | 1.15  | 0.43  | <i>Bacteroides</i>                          |
| OTU00156 | 24 | 0 | 1.28  | 2.22  | 1.48  | 0.28  | <i>Moryella indoligenes</i>                 |
| OTU00206 | 24 | 0 | 2.07  | 2.43  | 0.49  | -0.03 | <i>Moryella indoligenes</i>                 |
| OTU00102 | 24 | 0 | 1.95  | 4.86  | 2.2   | -0.31 | <i>Moryella indoligenes</i>                 |
| OTU00491 | 24 | 0 | 7.04  | 10.08 | 4.2   | 1.15  | <i>uncl. Erysipelotrichaceae</i>            |
| OTU00089 | 24 | 0 | 0.44  | 1.18  | 0.8   | 0.13  | <i>Ruminococcus gnavus</i>                  |
| OTU05301 | 25 | 0 | 1.21  | 0.82  | 2.54  | 2.18  | <i>uncl. S24-7</i>                          |
| OTU00258 | 25 | 0 | 1.34  | 0.89  | 1.99  | 3.44  | <i>Moryella indoligenes</i>                 |
| OTU00059 | 25 | 0 | -0.14 | 1.76  | 4.16  | 6.01  | <i>Coprococcus</i>                          |
| OTU00228 | 25 | 0 | -0.3  | 0.09  | 1.05  | 1.04  | <i>Moryella indoligenes</i>                 |
| OTU00018 | 25 | 0 | 0.92  | 0.81  | 2.12  | 2.44  | <i>uncl. Rikenellaceae</i>                  |
| OTU00849 | 25 | 0 | -0.31 | 0.39  | 0.74  | 1.3   | <i>uncl. Mogibacteriaceae</i>               |
| OTU00200 | 25 | 0 | 2.67  | 3.86  | 4.64  | 5.59  | <i>Moryella indoligenes</i>                 |
| OTU00246 | 25 | 0 | -0.82 | 0.32  | 2.11  | 2.54  | <i>Moryella indoligenes</i>                 |
| OTU25661 | 25 | 0 | 1.1   | 1.43  | 1.66  | 2.03  | <i>Dehalobacterium</i>                      |
| OTU00363 | 26 | 0 | 3.23  | 7.29  | 3.72  | 4.32  | <i>Bacteroides ovatus</i>                   |
| OTU00599 | 26 | 0 | 2     | 2.9   | 0.94  | 1.91  | <i>Staphylococcus epidermidis</i>           |
| OTU00217 | 26 | 0 | 0.39  | 1.04  | -0.23 | 0.59  | <i>Moryella indoligenes</i>                 |
| OTU01446 | 26 | 0 | 2.6   | 6.9   | 0.97  | 6     | <i>Christensenella</i>                      |
| OTU01336 | 26 | 0 | 2.22  | 4.82  | 0.14  | 1.3   | <i>Oscillospira</i>                         |
| OTU00174 | 26 | 0 | 1.04  | 4.35  | 1.99  | 4.05  | <i>Moryella indoligenes</i>                 |
| OTU00091 | 26 | 0 | -0.87 | 4.86  | 0.46  | 1.59  | <i>Ruminococcus gnavus</i>                  |
| OTU00220 | 26 | 0 | 0     | 2.05  | 0.41  | 0.57  | <i>Ruminococcus gnavus</i>                  |
| OTU00542 | 26 | 0 | 0.31  | 2.46  | 0.39  | 1.88  | <i>Adlercreutzia</i>                        |
| OTU00067 | 26 | 0 | 1.47  | 3.34  | 1.62  | 1.34  | <i>Coprococcus</i>                          |
| OTU00154 | 26 | 0 | -0.97 | 2.39  | 0.28  | 0.53  | <i>uncl. envOPS12</i>                       |
| OTU00158 | 26 | 0 | 1.28  | 2.33  | 1.42  | 1.7   | <i>Ruminococcus gnavus</i>                  |
| OTU01178 | 26 | 0 | 0.64  | 1.07  | 0.23  | 1     | <i>Prevotella</i>                           |
| OTU00203 | 26 | 0 | 1.14  | 4.33  | 1.45  | 2.88  | <i>uncl. Clostridiales</i>                  |
| OTU00538 | 26 | 0 | 0.23  | 3.35  | 0.59  | 1.49  | <i>Ruminococcus gnavus</i>                  |
| OTU00408 | 26 | 0 | -0.1  | 4.46  | 1.25  | 1.47  | <i>Roseburia faecis</i>                     |
| OTU00245 | 26 | 0 | -0.29 | 2.22  | -0.09 | 1.04  | <i>Moryella indoligenes</i>                 |
| OTU00457 | 27 | 0 | 0.25  | 1.38  | 1.51  | 1.04  | <i>Dehalobacterium</i>                      |
| OTU01776 | 27 | 0 | -0.39 | 1.56  | 1.84  | 0.74  | <i>uncl. Ruminococcaceae</i>                |
| OTU02184 | 27 | 0 | 1.31  | 3.88  | 2.82  | 2.12  | <i>Odoribacter</i>                          |
| OTU00111 | 27 | 0 | 0.77  | 5.66  | 5.32  | 5.71  | <i>Ruminococcus</i>                         |
| OTU00231 | 27 | 0 | -0.28 | 0.9   | 0.5   | -0.01 | <i>Dehalobacterium</i>                      |
| OTU00809 | 27 | 0 | 0.85  | 6.55  | 5.49  | 3.12  | <i>Moryella indoligenes</i>                 |
| OTU00993 | 27 | 0 | 1.55  | 2.18  | 2.14  | 1.04  | <i>uncl. S24-7</i>                          |
| OTU00569 | 28 | 0 | 2.53  | 0.91  | -0.13 | -0.34 | <i>Oribacterium</i>                         |
| OTU00180 | 28 | 0 | 1.99  | 0.44  | 0.33  | 0.12  | <i>uncl. S24-7</i>                          |
| OTU00185 | 28 | 0 | 3.84  | 2.56  | -2.33 | -0.16 | <i>Moryella indoligenes</i>                 |



|          |    |   |       |       |       |       |                                      |
|----------|----|---|-------|-------|-------|-------|--------------------------------------|
| OTU00189 | 28 | 0 | 3.01  | 1.99  | -0.32 | -1.29 | <i>Oribacterium</i>                  |
| OTU00134 | 28 | 0 | 4.3   | 2.84  | 1.55  | 0.32  | <i>uncl. Lachnospiraceae</i>         |
| OTU00417 | 28 | 0 | 4.44  | 4.23  | 0.09  | 0.38  | <i>Moryella indoligenes</i>          |
| OTU01020 | 28 | 0 | 8.46  | 2.42  | 0.95  | 2.21  | <i>SMB53</i>                         |
| OTU00259 | 28 | 0 | 5.47  | 6.08  | -0.4  | 1.09  | <i>Coprococcus</i>                   |
| OTU00256 | 28 | 0 | 5.36  | 3.42  | 0.35  | -0.36 | <i>Lachnobacterium</i>               |
| OTU00316 | 28 | 0 | 2.5   | 0.45  | -0.91 | 0.22  | <i>Ruminococcus gnavus</i>           |
| OTU00317 | 28 | 0 | 2.24  | 0.9   | 0.77  | 0.99  | <i>Parabacteroides</i>               |
| OTU00170 | 28 | 0 | 2.39  | -0.16 | 0.14  | -0.9  | <i>uncl. Rikenellaceae</i>           |
| OTU00899 | 28 | 0 | 1.06  | 0.84  | 0.43  | 0.59  | <i>Oscillospira</i>                  |
| OTU01345 | 28 | 0 | 3.13  | 3.31  | -0.38 | -1.01 | <i>uncl. Ruminococcaceae</i>         |
| OTU00313 | 28 | 0 | 2.66  | 2.14  | -0.76 | -0.27 | <i>Ruminococcus gnavus</i>           |
| OTU00356 | 28 | 0 | 1.99  | 2.1   | -0.62 | -0.06 | <i>Ruminococcus gnavus</i>           |
| OTU00357 | 28 | 0 | 2.29  | 2.24  | 0.23  | 0.45  | <i>Oxobacter</i>                     |
| OTU00588 | 28 | 0 | 2.63  | 2.6   | -0.21 | -1.11 | <i>uncl. Ruminococcaceae</i>         |
| OTU00464 | 28 | 0 | 1.57  | 2.15  | -0.25 | 0.41  | <i>Adlercreutzia</i>                 |
| OTU00308 | 28 | 0 | 3.16  | 2.08  | -2.07 | -1.63 | <i>uncl. Lachnospiraceae</i>         |
| OTU00266 | 28 | 0 | 4.49  | 4.23  | 1.05  | 0.86  | <i>Butyrivibrio</i>                  |
| OTU00168 | 28 | 0 | 4.05  | 4.65  | -0.6  | 1.13  | <i>Lachnospira</i>                   |
| OTU00166 | 28 | 0 | 1.06  | -0.23 | -0.55 | -0.75 | <i>uncl. Ruminococcaceae</i>         |
| OTU00161 | 28 | 0 | 4.13  | 1.92  | 1.69  | 1.26  | <i>Candidatus_Phytoplasma solani</i> |
| OTU00116 | 28 | 0 | 3.15  | 2.92  | -1.72 | -0.21 | <i>Lachnospira</i>                   |
| OTU00500 | 28 | 0 | 5.29  | 2.83  | 0.38  | 0.66  | <i>uncl. Christensenellaceae</i>     |
| OTU00434 | 28 | 0 | 6.17  | 6.97  | -0.93 | 0.17  | <i>uncl. Desulfovibrionaceae</i>     |
| OTU00276 | 28 | 0 | 7.58  | -0.59 | 1.24  | -0.66 | <i>Anaerostipes</i>                  |
| OTU00073 | 28 | 0 | 3.16  | 1.99  | -0.2  | 0     | <i>Oribacterium</i>                  |
| OTU00075 | 28 | 0 | 5.18  | 2.23  | 2.14  | 2.89  | <i>Sutterella</i>                    |
| OTU00192 | 28 | 0 | 0.96  | 0.26  | -0.34 | 0.09  | <i>Faecalibacterium prausnitzii</i>  |
| OTU00204 | 28 | 0 | 3.55  | 1.55  | 1.87  | 1.28  | <i>uncl. S24-7</i>                   |
| OTU00207 | 28 | 0 | 10.13 | -0.78 | 1.54  | -0.12 | <i>uncl. YS2</i>                     |
| OTU00614 | 28 | 0 | 2     | 0.37  | 0.68  | 0.24  | <i>Adlercreutzia</i>                 |
| OTU00240 | 28 | 0 | 9.49  | -0.15 | 0.26  | -0.5  | <i>AF12</i>                          |
| OTU00327 | 28 | 0 | 1.48  | 0.01  | 0.19  | -0.9  | <i>Coprococcus</i>                   |
| OTU00086 | 28 | 0 | 4.26  | 3.78  | -0.33 | 0.68  | <i>Moryella indoligenes</i>          |
| OTU00142 | 28 | 0 | 1.38  | 0.49  | -0.37 | -0.28 | <i>Oscillospira</i>                  |
| OTU00096 | 29 | 0 | 0.81  | 0.85  | 0.35  | 1.9   | <i>uncl. S24-7</i>                   |
| OTU00053 | 29 | 0 | 5.58  | 6.55  | 1.01  | 6.54  | <i>uncl. Bacteroidales</i>           |
| OTU02317 | 29 | 0 | 2.8   | 4.08  | 0.87  | 3.98  | <i>uncl. envOPS12</i>                |
| OTU00712 | 29 | 0 | 7.97  | 7.78  | 1.45  | 7.96  | <i>uncl. Ruminococcaceae</i>         |
| OTU00087 | 29 | 0 | 5.99  | 4.67  | 1.67  | 4.58  | <i>uncl. S24-7</i>                   |

\* The data was transformed as  $\log_2$  (median of relative abundance of AOM/DSS cycle *i* / median of relative abundance of control)

**Table S6 OTUs correlated with tumor counts**

| OTU      | Green gene classification           | Correlation coefficient | P-value |
|----------|-------------------------------------|-------------------------|---------|
| OTU00002 | <i>uncl. S24-7</i>                  | 0.88                    | 0.05    |
| OTU00014 | <i>uncl. S24-7</i>                  | 0.94                    | 0.02    |
| OTU00016 | <i>Odoribacter</i>                  | 0.94                    | 0.02    |
| OTU00023 | <i>uncl. S24-7</i>                  | 0.97                    | 0.01    |
| OTU00052 | <i>uncl. S24-7</i>                  | -0.93                   | 0.02    |
| OTU00058 | <i>Moryella indoligenes</i>         | 1.00                    | 0.00    |
| OTU00059 | <i>Coprococcus</i>                  | 1.00                    | 0.00    |
| OTU00065 | <i>Ruminococcus gnavus</i>          | 0.93                    | 0.02    |
| OTU00131 | <i>Bacteroides</i>                  | -0.91                   | 0.03    |
| OTU00152 | <i>Coprococcus</i>                  | 0.98                    | 0.00    |
| OTU00195 | <i>Ruminococcus gnavus</i>          | 0.94                    | 0.02    |
| OTU00200 | <i>Moryella indoligenes</i>         | 0.97                    | 0.01    |
| OTU00205 | <i>uncl. RF32</i>                   | 0.93                    | 0.02    |
| OTU00206 | <i>Moryella indoligenes</i>         | -0.89                   | 0.05    |
| OTU00210 | <i>Coprococcus</i>                  | 0.89                    | 0.04    |
| OTU00246 | <i>Moryella indoligenes</i>         | 1.00                    | 0.00    |
| OTU00258 | <i>Moryella indoligenes</i>         | 0.92                    | 0.03    |
| OTU00302 | <i>Coprococcus</i>                  | 0.99                    | 0.00    |
| OTU00338 | <i>Moryella indoligenes</i>         | 0.96                    | 0.01    |
| OTU00345 | <i>Lachnobacterium</i>              | 0.90                    | 0.04    |
| OTU00471 | <i>Ruminococcus gnavus</i>          | 0.95                    | 0.01    |
| OTU00531 | <i>uncl. S24-7</i>                  | 0.98                    | 0.00    |
| OTU00549 | <i>Moryella indoligenes</i>         | 0.94                    | 0.02    |
| OTU00561 | <i>Ruminococcus</i>                 | 1.00                    | 0.00    |
| OTU00588 | <i>uncl. Ruminococcaceae</i>        | -0.92                   | 0.03    |
| OTU00597 | <i>uncl. S24-7</i>                  | 0.97                    | 0.01    |
| OTU00634 | <i>Faecalibacterium prausnitzii</i> | 0.91                    | 0.03    |
| OTU00675 | <i>Moryella indoligenes</i>         | 0.97                    | 0.01    |
| OTU00850 | <i>Moryella indoligenes</i>         | 0.94                    | 0.02    |
| OTU00957 | <i>Moryella indoligenes</i>         | 1.00                    | 0.00    |
| OTU01029 | <i>uncl. Rikenellaceae</i>          | 0.90                    | 0.04    |
| OTU01136 | <i>uncl. S24-7</i>                  | 0.96                    | 0.01    |
| OTU01356 | <i>Faecalibacterium prausnitzii</i> | 0.89                    | 0.04    |
| OTU01692 | <i>Adlercreutzia</i>                | 0.93                    | 0.02    |
| OTU02929 | <i>Moryella indoligenes</i>         | 0.98                    | 0.00    |
| OTU03214 | <i>uncl. Rikenellaceae</i>          | 0.88                    | 0.05    |

**Table S7 OTUs correlated with molecule expressions**

| Molecule         | OTU      | Correlation coefficient | P-value | Taxonomy                                    |
|------------------|----------|-------------------------|---------|---------------------------------------------|
| $\beta$ -catenin | OTU00038 | 0.93                    | 0.02    | <i>uncl. S24-7</i>                          |
| $\beta$ -catenin | OTU00047 | 0.93                    | 0.02    | <i>uncl. S24-7</i>                          |
| $\beta$ -catenin | OTU00059 | 0.88                    | 0.05    | <i>Coprococcus</i>                          |
| $\beta$ -catenin | OTU00063 | 0.89                    | 0.04    | <i>uncl. S24-7</i>                          |
| $\beta$ -catenin | OTU00084 | 0.89                    | 0.04    | <i>Oscillospira</i>                         |
| $\beta$ -catenin | OTU00110 | 0.99                    | 0.00    | <i>uncl. S24-7</i>                          |
| $\beta$ -catenin | OTU00111 | 0.91                    | 0.03    | <i>Ruminococcus</i>                         |
| $\beta$ -catenin | OTU00134 | -0.91                   | 0.03    | <i>uncl. Lachnospiraceae</i>                |
| $\beta$ -catenin | OTU00185 | -0.89                   | 0.04    | <i>Moryella indoligenes</i>                 |
| $\beta$ -catenin | OTU00195 | 0.89                    | 0.05    | <i>Ruminococcus gnavus</i>                  |
| $\beta$ -catenin | OTU00200 | 0.97                    | 0.01    | <i>Moryella indoligenes</i>                 |
| $\beta$ -catenin | OTU00205 | 0.89                    | 0.04    | <i>uncl. RF32</i>                           |
| $\beta$ -catenin | OTU00246 | 0.90                    | 0.04    | <i>Moryella indoligenes</i>                 |
| $\beta$ -catenin | OTU00302 | 0.89                    | 0.04    | <i>Coprococcus</i>                          |
| $\beta$ -catenin | OTU00313 | -0.91                   | 0.03    | <i>Ruminococcus gnavus</i>                  |
| $\beta$ -catenin | OTU00327 | -0.89                   | 0.04    | <i>Coprococcus</i>                          |
| $\beta$ -catenin | OTU00345 | 0.92                    | 0.03    | <i>Lachnobacterium</i>                      |
| $\beta$ -catenin | OTU00357 | -0.92                   | 0.03    | <i>Oxobacter</i>                            |
| $\beta$ -catenin | OTU00525 | -0.90                   | 0.04    | <i>uncl. Rikenellaceae</i>                  |
| $\beta$ -catenin | OTU00757 | -0.93                   | 0.02    | <i>Faecalibacterium prausnitzii</i>         |
| $\beta$ -catenin | OTU00849 | 0.97                    | 0.01    | <i>uncl. Mogibacteriaceae</i>               |
| $\beta$ -catenin | OTU00957 | 0.89                    | 0.05    | <i>Moryella indoligenes</i>                 |
| $\beta$ -catenin | OTU00973 | 0.96                    | 0.01    | <i>uncl. Rikenellaceae</i>                  |
| $\beta$ -catenin | OTU01070 | -0.90                   | 0.04    | <i>Coprococcus</i>                          |
| $\beta$ -catenin | OTU01356 | 0.91                    | 0.03    | <i>Faecalibacterium prausnitzii</i>         |
| $\beta$ -catenin | OTU02507 | 0.91                    | 0.03    | <i>uncl. S24-7</i>                          |
| $\beta$ -catenin | OTU02576 | 0.92                    | 0.03    | <i>uncl. S24-7</i>                          |
| $\beta$ -catenin | OTU25661 | 0.88                    | 0.05    | <i>Dehalobacterium</i>                      |
| $\beta$ -catenin | OTU26030 | 0.88                    | 0.05    | <i>O2d06</i>                                |
| CCR2             | OTU00044 | -0.94                   | 0.02    | <i>Candidatus_Phytoplasma witches-broom</i> |
| CCR2             | OTU00064 | 0.93                    | 0.02    | <i>uncl. S24-7</i>                          |
| CCR2             | OTU00069 | -0.90                   | 0.04    | <i>uncl. S24-7</i>                          |
| CCR2             | OTU00084 | 0.94                    | 0.02    | <i>Oscillospira</i>                         |
| CCR2             | OTU00110 | 0.91                    | 0.03    | <i>uncl. S24-7</i>                          |
| CCR2             | OTU00134 | -0.93                   | 0.02    | <i>uncl. Lachnospiraceae</i>                |
| CCR2             | OTU00241 | -0.95                   | 0.01    | <i>Flexithrix dorotheae</i>                 |
| CCR2             | OTU00313 | -0.89                   | 0.04    | <i>Ruminococcus gnavus</i>                  |
| CCR2             | OTU00318 | -0.90                   | 0.04    | <i>Moryella</i>                             |
| CCR2             | OTU00357 | -1.00                   | 0.00    | <i>Oxobacter</i>                            |
| CCR2             | OTU00460 | -0.95                   | 0.01    | <i>Ruminococcus gnavus</i>                  |
| CCR2             | OTU00525 | -0.94                   | 0.02    | <i>uncl. Rikenellaceae</i>                  |
| CCR2             | OTU00728 | 0.93                    | 0.02    | <i>Wandonia</i>                             |
| CCR2             | OTU00907 | 0.91                    | 0.03    | <i>Lactobacillus hamsteri</i>               |
| CCR2             | OTU00926 | -0.89                   | 0.04    | <i>uncl. Rikenellaceae</i>                  |
| CCR2             | OTU00973 | 0.98                    | 0.00    | <i>uncl. Rikenellaceae</i>                  |
| CCR2             | OTU01029 | 0.88                    | 0.05    | <i>uncl. Rikenellaceae</i>                  |

|      |          |       |      |                                             |
|------|----------|-------|------|---------------------------------------------|
| CCR2 | OTU02724 | -0.93 | 0.02 | <i>uncl. Rikenellaceae</i>                  |
| CCR2 | OTU25661 | 0.95  | 0.01 | <i>Dehalobacterium</i>                      |
| CCR2 | OTU26030 | 0.90  | 0.04 | <i>O2d06</i>                                |
| COX2 | OTU00029 | -0.89 | 0.04 | <i>uncl. S24-7</i>                          |
| COX2 | OTU00047 | 1.00  | 0.00 | <i>uncl. S24-7</i>                          |
| COX2 | OTU00063 | 0.97  | 0.01 | <i>uncl. S24-7</i>                          |
| COX2 | OTU00069 | -0.91 | 0.03 | <i>uncl. S24-7</i>                          |
| COX2 | OTU00104 | -0.88 | 0.05 | <i>Coprococcus</i>                          |
| COX2 | OTU00110 | 0.95  | 0.01 | <i>uncl. S24-7</i>                          |
| COX2 | OTU00111 | 0.97  | 0.01 | <i>Ruminococcus</i>                         |
| COX2 | OTU00134 | -0.99 | 0.00 | <i>uncl. Lachnospiraceae</i>                |
| COX2 | OTU00153 | -0.91 | 0.03 | <i>Moryella indoligenes</i>                 |
| COX2 | OTU00176 | 0.88  | 0.05 | <i>uncl. S24-7</i>                          |
| COX2 | OTU00185 | -0.95 | 0.01 | <i>Moryella indoligenes</i>                 |
| COX2 | OTU00192 | -0.92 | 0.03 | <i>Faecalibacterium prausnitzii</i>         |
| COX2 | OTU00313 | -0.94 | 0.02 | <i>Ruminococcus gnavus</i>                  |
| COX2 | OTU00327 | -0.96 | 0.01 | <i>Coprococcus</i>                          |
| COX2 | OTU00357 | -0.88 | 0.05 | <i>Oxobacter</i>                            |
| COX2 | OTU00378 | 0.97  | 0.01 | <i>Christensenella</i>                      |
| COX2 | OTU00460 | -0.90 | 0.04 | <i>Ruminococcus gnavus</i>                  |
| COX2 | OTU00525 | -0.94 | 0.02 | <i>uncl. Rikenellaceae</i>                  |
| COX2 | OTU00757 | -0.91 | 0.03 | <i>Faecalibacterium prausnitzii</i>         |
| COX2 | OTU00849 | 0.90  | 0.04 | <i>uncl. Mogibacteriaceae</i>               |
| COX2 | OTU00871 | -0.91 | 0.03 | <i>Coprococcus</i>                          |
| COX2 | OTU00973 | 0.96  | 0.01 | <i>uncl. Rikenellaceae</i>                  |
| COX2 | OTU00978 | -0.98 | 0.00 | <i>Roseburia faecis</i>                     |
| COX2 | OTU01070 | -0.97 | 0.01 | <i>Coprococcus</i>                          |
| COX2 | OTU01165 | -0.95 | 0.02 | <i>Blautia</i>                              |
| COX2 | OTU01207 | 0.90  | 0.04 | <i>Ruminococcus callidus</i>                |
| COX2 | OTU02210 | -0.98 | 0.00 | <i>uncl. Christensenellaceae</i>            |
| COX2 | OTU02507 | 0.91  | 0.03 | <i>uncl. S24-7</i>                          |
| COX2 | OTU02576 | 0.89  | 0.04 | <i>uncl. S24-7</i>                          |
| COX2 | OTU02724 | -0.98 | 0.00 | <i>uncl. Rikenellaceae</i>                  |
| COX2 | OTU03405 | -0.96 | 0.01 | <i>uncl. Ruminococcaceae</i>                |
| COX2 | OTU25221 | -0.94 | 0.02 | <i>Moryella indoligenes</i>                 |
| COX2 | OTU25661 | 0.93  | 0.02 | <i>Dehalobacterium</i>                      |
| p53  | OTU00044 | -0.89 | 0.04 | <i>Candidatus_Phytoplasma witches-broom</i> |
| p53  | OTU00047 | 0.93  | 0.02 | <i>uncl. S24-7</i>                          |
| p53  | OTU00060 | 0.88  | 0.05 | <i>uncl. S24-7</i>                          |
| p53  | OTU00069 | -0.93 | 0.02 | <i>uncl. S24-7</i>                          |
| p53  | OTU00082 | 0.90  | 0.04 | <i>Bacteroides uniformis</i>                |
| p53  | OTU00101 | 0.90  | 0.04 | <i>uncl. S24-7</i>                          |
| p53  | OTU00134 | -0.97 | 0.00 | <i>uncl. Lachnospiraceae</i>                |
| p53  | OTU00166 | -0.88 | 0.05 | <i>uncl. Ruminococcaceae</i>                |
| p53  | OTU00254 | -0.89 | 0.04 | <i>Ruminococcus gnavus</i>                  |
| p53  | OTU00260 | 0.90  | 0.04 | <i>uncl. S24-7</i>                          |
| p53  | OTU00272 | -0.88 | 0.05 | <i>Moryella indoligenes</i>                 |
| p53  | OTU00288 | 0.92  | 0.03 | <i>Oscillospira</i>                         |
| p53  | OTU00313 | -0.93 | 0.02 | <i>Ruminococcus gnavus</i>                  |
| p53  | OTU00357 | -0.91 | 0.03 | <i>Oxobacter</i>                            |

|               |          |       |      |                                  |
|---------------|----------|-------|------|----------------------------------|
| p53           | OTU00378 | 0.98  | 0.00 | <i>Christensenella</i>           |
| p53           | OTU00460 | -0.92 | 0.03 | <i>Ruminococcus gnavus</i>       |
| p53           | OTU00525 | -0.97 | 0.01 | <i>uncl. Rikenellaceae</i>       |
| p53           | OTU00728 | 0.88  | 0.05 | <i>Wandonia</i>                  |
| p53           | OTU00871 | -0.98 | 0.00 | <i>Coprococcus</i>               |
| p53           | OTU00925 | -0.90 | 0.04 | <i>Coprococcus catus</i>         |
| p53           | OTU00926 | -0.90 | 0.04 | <i>uncl. Rikenellaceae</i>       |
| p53           | OTU00973 | 0.95  | 0.01 | <i>uncl. Rikenellaceae</i>       |
| p53           | OTU00978 | -0.90 | 0.04 | <i>Roseburia faecis</i>          |
| p53           | OTU01105 | 0.93  | 0.02 | <i>uncl. S24-7</i>               |
| p53           | OTU01165 | -0.95 | 0.01 | <i>Blautia</i>                   |
| p53           | OTU02210 | -0.91 | 0.03 | <i>uncl. Christensenellaceae</i> |
| p53           | OTU02724 | -0.99 | 0.00 | <i>uncl. Rikenellaceae</i>       |
| p53           | OTU25661 | 0.98  | 0.00 | <i>Dehalobacterium</i>           |
| p65           | OTU00021 | 1.00  | 0.00 | <i>uncl. S24-7</i>               |
| p65           | OTU00064 | 0.89  | 0.05 | <i>uncl. S24-7</i>               |
| p65           | OTU00070 | 0.93  | 0.02 | <i>uncl. S24-7</i>               |
| p65           | OTU00084 | 0.90  | 0.04 | <i>Oscillospira</i>              |
| p65           | OTU00131 | -0.92 | 0.03 | <i>Bacteroides</i>               |
| p65           | OTU00145 | 0.96  | 0.01 | <i>Ruminococcus</i>              |
| p65           | OTU00184 | 0.91  | 0.03 | <i>Lactobacillus reuteri</i>     |
| p65           | OTU00204 | 0.89  | 0.04 | <i>uncl. S24-7</i>               |
| p65           | OTU00244 | -0.88 | 0.05 | <i>Coprococcus</i>               |
| p65           | OTU00250 | -0.89 | 0.04 | <i>Moryella indoligenes</i>      |
| p65           | OTU00318 | -0.88 | 0.05 | <i>Moryella</i>                  |
| p65           | OTU00585 | -0.93 | 0.02 | <i>Moryella indoligenes</i>      |
| p65           | OTU00648 | -0.93 | 0.02 | <i>uncl. Holosporaceae</i>       |
| p65           | OTU00907 | 0.92  | 0.03 | <i>Lactobacillus hamsteri</i>    |
| p65           | OTU01171 | 0.93  | 0.02 | <i>uncl. Mogibacteriaceae</i>    |
| p65           | OTU01270 | -0.92 | 0.03 | <i>Moryella indoligenes</i>      |
| p65           | OTU01413 | -0.95 | 0.01 | <i>uncl. Ruminococcaceae</i>     |
| p65           | OTU02444 | 0.94  | 0.02 | <i>Adlercreutzia</i>             |
| p65           | OTU05670 | -0.97 | 0.00 | <i>Ruminococcus</i>              |
| PPARG         | OTU00002 | 0.93  | 0.02 | <i>uncl. S24-7</i>               |
| PPARG         | OTU00003 | -0.88 | 0.05 | <i>Bacteroides</i>               |
| PPARG         | OTU00013 | -0.91 | 0.03 | <i>Ruminococcus gnavus</i>       |
| PPAR $\gamma$ | OTU00023 | 0.92  | 0.03 | <i>uncl. S24-7</i>               |
| PPAR $\gamma$ | OTU00040 | 0.91  | 0.03 | <i>uncl. S24-7</i>               |
| PPAR $\gamma$ | OTU00052 | -0.97 | 0.01 | <i>uncl. S24-7</i>               |
| PPAR $\gamma$ | OTU00058 | 0.93  | 0.02 | <i>Moryella indoligenes</i>      |
| PPAR $\gamma$ | OTU00059 | 0.93  | 0.02 | <i>Coprococcus</i>               |
| PPAR $\gamma$ | OTU00064 | 0.91  | 0.03 | <i>uncl. S24-7</i>               |
| PPAR $\gamma$ | OTU00065 | 0.95  | 0.01 | <i>Ruminococcus gnavus</i>       |
| PPAR $\gamma$ | OTU00084 | 0.93  | 0.02 | <i>Oscillospira</i>              |
| PPAR $\gamma$ | OTU00131 | -0.92 | 0.02 | <i>Bacteroides</i>               |
| PPAR $\gamma$ | OTU00152 | 0.89  | 0.05 | <i>Coprococcus</i>               |
| PPAR $\gamma$ | OTU00195 | 1.00  | 0.00 | <i>Ruminococcus gnavus</i>       |
| PPAR $\gamma$ | OTU00200 | 0.94  | 0.02 | <i>Moryella indoligenes</i>      |
| PPAR $\gamma$ | OTU00205 | 0.99  | 0.00 | <i>uncl. RF32</i>                |
| PPAR $\gamma$ | OTU00206 | -0.95 | 0.01 | <i>Moryella indoligenes</i>      |

---

|               |          |       |      |                                     |
|---------------|----------|-------|------|-------------------------------------|
| PPAR $\gamma$ | OTU00210 | 0.97  | 0.01 | <i>Coprococcus</i>                  |
| PPAR $\gamma$ | OTU00241 | -0.91 | 0.03 | <i>Flexithrix dorotheae</i>         |
| PPAR $\gamma$ | OTU00246 | 0.94  | 0.02 | <i>Moryella indoligenes</i>         |
| PPAR $\gamma$ | OTU00302 | 0.96  | 0.01 | <i>Coprococcus</i>                  |
| PPAR $\gamma$ | OTU00345 | 0.99  | 0.00 | <i>Lachnobacterium</i>              |
| PPAR $\gamma$ | OTU00356 | -0.96 | 0.01 | <i>Ruminococcus gnavus</i>          |
| PPAR $\gamma$ | OTU00561 | 0.91  | 0.03 | <i>Ruminococcus</i>                 |
| PPAR $\gamma$ | OTU00624 | 0.95  | 0.01 | <i>uncl. Ruminococcaceae</i>        |
| PPAR $\gamma$ | OTU00849 | 0.93  | 0.02 | <i>uncl. Mogibacteriaceae</i>       |
| PPAR $\gamma$ | OTU00850 | 0.96  | 0.01 | <i>Moryella indoligenes</i>         |
| PPAR $\gamma$ | OTU00929 | 0.89  | 0.04 | <i>uncl. envOPS12</i>               |
| PPAR $\gamma$ | OTU00957 | 0.94  | 0.02 | <i>Moryella indoligenes</i>         |
| PPAR $\gamma$ | OTU01029 | 0.97  | 0.01 | <i>uncl. Rikenellaceae</i>          |
| PPAR $\gamma$ | OTU01356 | 0.99  | 0.00 | <i>Faecalibacterium prausnitzii</i> |
| PPAR $\gamma$ | OTU25580 | 0.95  | 0.01 | <i>Adlercreutzia</i>                |
| PPAR $\gamma$ | OTU26030 | 0.98  | 0.00 | <i>02d06</i>                        |

---

**Table S8 Comparisons of sequence divergence distributions between OTUs in dynamic profiles and randomly selected sequences of 97% OTUs.**

| <b>Profile ID</b> | <b>P-value</b> |
|-------------------|----------------|
| 28                | 7.47E-55       |
| 12                | 4.04E-23       |
| 20                | 6.62E-07       |
| 11                | 2.56E-06       |
| 23                | 2.20E-04       |
| 17                | 3.55E-10       |
| 26                | 3.22E-14       |
| 10                | 2.87E-11       |
| 19                | 5.94E-04       |
| 21                | 2.39E-08       |
| 24                | 3.66E-07       |
| 16                | 4.75E-07       |
| 18                | 7.72E-05       |
| 0                 | 2.83E-02       |
| 4                 | 2.76E-03       |
| 3                 | 1.28E-02       |
| 5                 | 3.28E-04       |
| 6                 | 3.26E-04       |
| 14                | 4.32E-03       |
| 25                | 3.47E-02       |
| 7                 | 2.39E-03       |
| 8                 | 2.81E-02       |
| 13                | 8.67E-01       |
| 1                 | 6.51E-01       |
| 22                | 9.70E-02       |
| 27                | 8.27E-01       |
| 2                 | 7.66E-01       |
| 15                | 3.44E-01       |
| 29                | 8.21E-02       |
| 9                 | 4.98E-02       |

---

**Table S9 mothur commands**

---

```
pcr.seqs(fasta=gg_13_5_99.fasta,oligos=pcrV3.oligos,keepdots=F,processors=4)
make.contigs(file=dds_sample.files,processors=4)
summary.seqs(fasta=dds_sample.trim.contigs.fasta,processors=4)
screen.seqs(fasta=dds_sample.trim.contigs.fasta,group=dds_sample.contigs.groups,
summary=dds_sample.trim.contigs.summary,maxambig=0,maxlength=210)
summary.seqs(fasta=dds_sample.trim.contigs.good.fasta)
unique.seqs(fasta=dds_sample.trim.contigs.good.fasta)
count.seqs(name=dds_sample.trim.contigs.good.names,group=dds_sample.contigs.good.groups)
summary.seqs(count=dds_sample.trim.contigs.good.count_table,processors=4)
align.seqs(fasta=dds_sample.trim.contigs.good.unique.fasta,reference=v3.fasta,processors=4)
summary.seqs(fasta=dds_sample.trim.contigs.good.unique.align,
count=dds_sample.trim.contigs.good.count_table)
screen.seqs(fasta=dds_sample.trim.contigs.good.unique.align,
count=dds_sample.trim.contigs.good.count_table,
summary=dds_sample.trim.contigs.good.unique.summary,start=2,end=6699,
maxhomop=8,processors=4)
summary.seqs(fasta=current,count=current)
filter.seqs(fasta=dds_sample.trim.contigs.good.unique.good.align,vertical=T,trump=.)
unique.seqs(fasta=dds_sample.trim.contigs.good.unique.good.filter.fasta,
count=dds_sample.trim.contigs.good.good.count_table)
pre.cluster(fasta=dds_sample.trim.contigs.good.unique.good.filter.unique.fasta,
count=dds_sample.trim.contigs.good.unique.good.filter.count_table,diffs=2)
chimera.uchime(fasta=dds_sample.trim.contigs.good.unique.good.filter.unique.precluster.fasta,
count=dds_sample.trim.contigs.good.unique.good.filter.unique.precluster.count_table,dereplicate=t)
remove.seqs(fasta=dds_sample.trim.contigs.good.unique.good.filter.unique.precluster.fasta,
accnos=dds_sample.trim.contigs.good.unique.good.filter.unique.precluster.uchime.accnos)
summary.seqs(fasta=current,count=current)
classify.seqs(fasta=dds_sample.trim.contigs.good.unique.good.filter.unique.precluster.pick.fasta,
count=dds_sample.trim.contigs.good.unique.good.filter.unique.precluster.uchime.pick.count_table,
reference=trainset.fasta,taxonomy=trainset.pds.tax)
remove.lineage(fasta=dds_sample.trim.contigs.good.unique.good.filter.unique.precluster.pick.fasta,
count=dds_sample.trim.contigs.good.unique.good.filter.unique.precluster.uchime.pick.count_table,
taxonomy=dds_sample.trim.contigs.good.unique.good.filter.unique.precluster.pick.pds.wang.taxonom
y,taxon=Chloroplast-Mitochondria-unknown-Archaea-Eukaryota)
dist.seqs(fasta=dds_sample.trim.contigs.good.unique.good.filter.unique.precluster.pick.pick.fasta,
cutoff=0.2)
cluster(column=dds_sample.trim.contigs.good.unique.good.filter.unique.precluster.pick.pick.dist,
count=dds_sample.trim.contigs.good.unique.good.filter.unique.precluster.uchime.pick.pick.count_tabl
e)
make.shared(list=dds_sample.trim.contigs.good.unique.good.filter.unique.precluster.pick.pick.an.uniq
ue_list.list,
count=dds_sample.trim.contigs.good.unique.good.filter.unique.precluster.uchime.pick.pick.count_tabl
e)
```



---

```
sub.sample(shared=dds_sample.trim.contigs.good.unique.good.filter.unique.precluster.pick.pick.an.unique_list.shared,size=614247)
rarefaction.single(shared=dds_sample.trim.contigs.good.unique.good.filter.unique.precluster.pick.pick.an.unique_list.0.03.subsample.shared,calc=sobs,freq=1000,processors=4)
summary.single(shared=dds_sample.trim.contigs.good.unique.good.filter.unique.precluster.pick.pick.an.unique_list.0.03.subsample.shared,calc=sobs-chao-ace-invsimpson-shannon-simpson-even-shannon-even)
tree.shared(shared=dds_sample.trim.contigs.good.unique.good.filter.unique.precluster.pick.pick.an.unique_list.0.03.subsample.shared,calc=jest-thetayc-braycurtis)
dist.shared(shared=dds_sample.trim.contigs.good.unique.good.filter.unique.precluster.pick.pick.an.unique_list.0.03.subsample.shared,calc=jest-thetayc-braycurtis)
nmds(phylip=dds_sample.trim.contigs.good.unique.good.filter.unique.precluster.pick.pick.an.unique_list.0.03.subsample.jest.0.03.lt.dist,mindim=3,maxdim=3)
nmds(phylip=dds_sample.trim.contigs.good.unique.good.filter.unique.precluster.pick.pick.an.unique_list.0.03.subsample.thetayc.0.03.lt.dist,mindim=3,maxdim=3)
nmds(phylip=dds_sample.trim.contigs.good.unique.good.filter.unique.precluster.pick.pick.an.unique_list.0.03.subsample.braycurtis.0.03.lt.dist,mindim=3,maxdim=3)
amova(phylip=dds_sample.trim.contigs.good.unique.good.filter.unique.precluster.pick.pick.an.unique_list.0.03.subsample.jest.0.03.lt.dist,design=dds_design)
amova(phylip=dds_sample.trim.contigs.good.unique.good.filter.unique.precluster.pick.pick.an.unique_list.0.03.subsample.thetayc.0.03.lt.dist,design=dds_design)
amova(phylip=dds_sample.trim.contigs.good.unique.good.filter.unique.precluster.pick.pick.an.unique_list.0.03.subsample.braycurtis.0.03.lt.dist,design=dds_design)
```

---

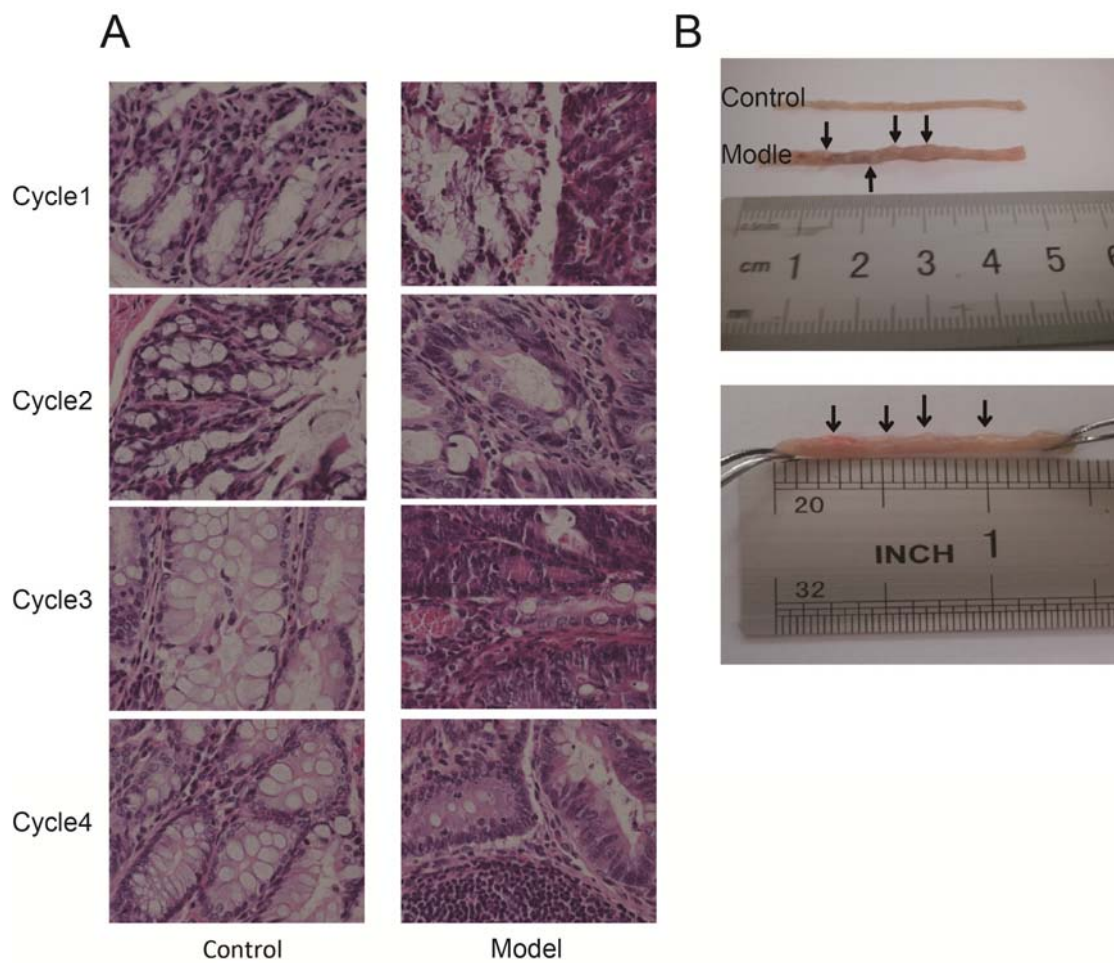

**Fig. S1 Pathological development of colitis-associated colorectal cancer murine model.** (A) H&E stains of sections of mouse colon tissues, model group mice treated with AOM+1~4 DSS cycles. (B) Macroscopic view shows tumors in the distal colons of mice with AOM+3 DSS cycles.

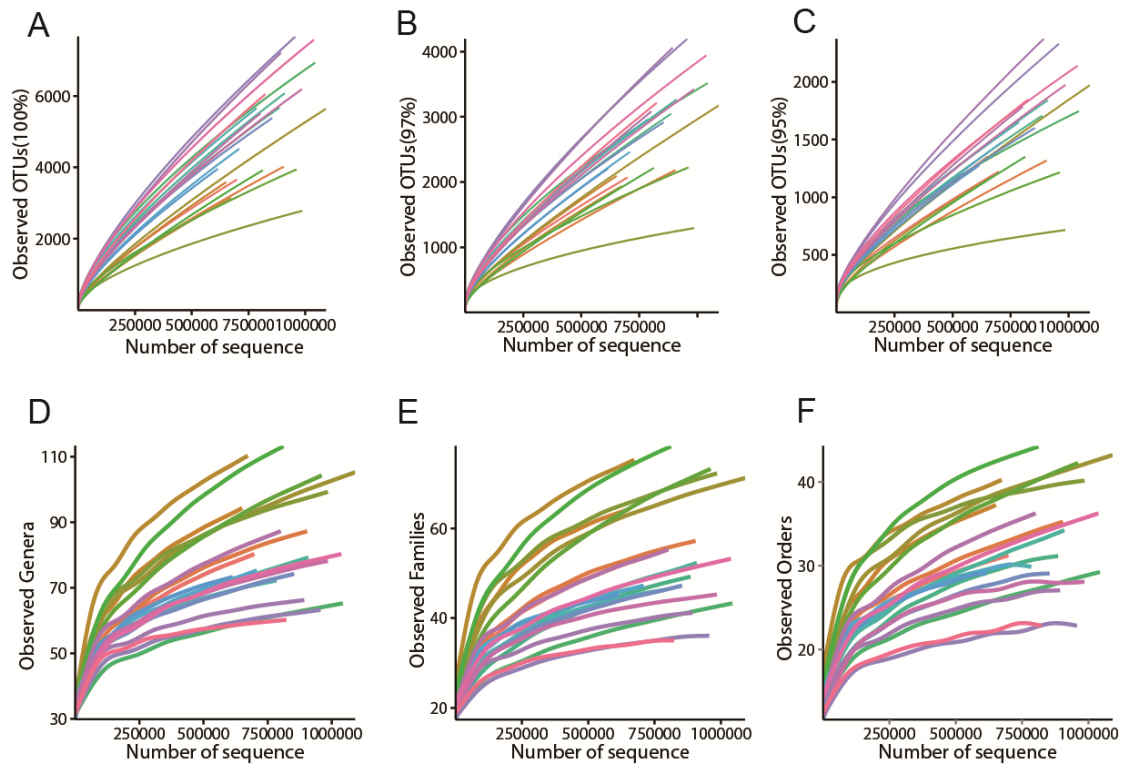

**Fig. S2 Rarefaction curves of samples.** Rarefaction curves were based on (A) unique sequences, (B) 97% OTUs, (C) 95% OTUs, (D) observed genera, (E) observed families and (F) observed orders.

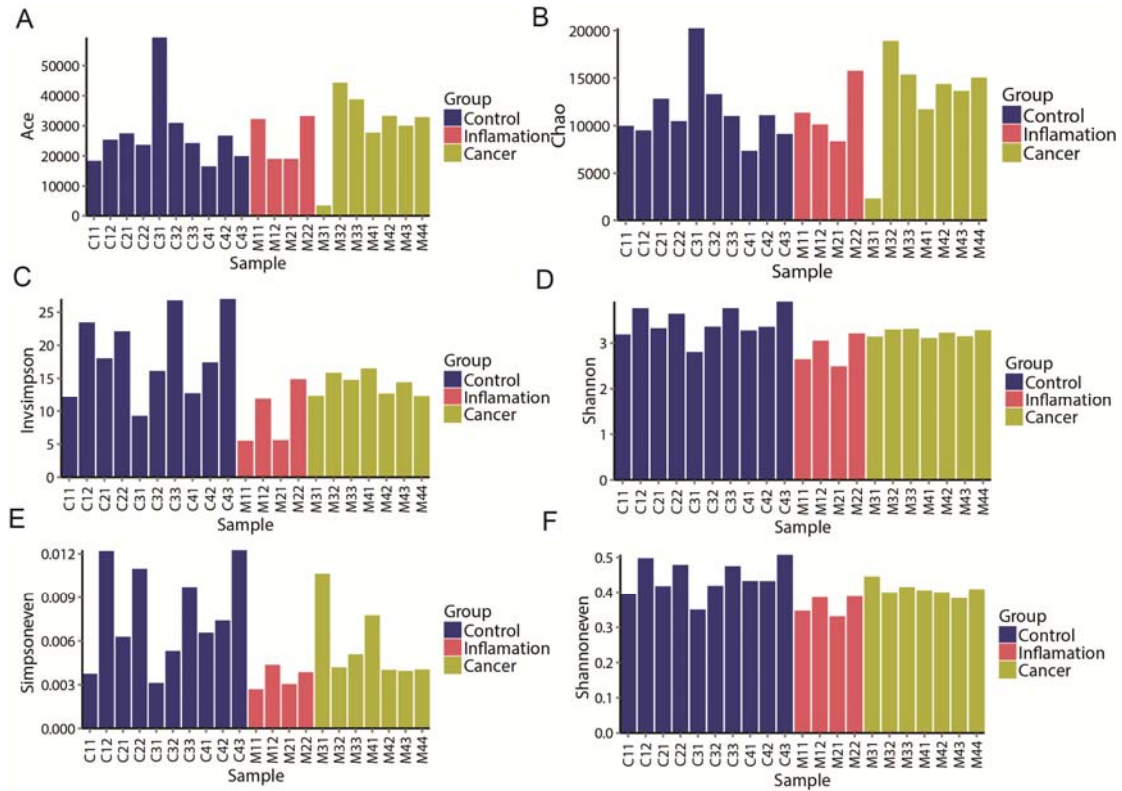

**Fig. S3 Bar plots of estimators of alpha diversity.** (A) Chao, (B) ACE, (C) Inverse Simpson index, (D) Shannon index, (E) Simpson index-based measure of evenness, (F) Shannon index-based measure of evenness. Sample was denominated as following rules: the beginning C/M represents control or model group; the middle number represents the number of AOM/DSS cycles for model group or batch of euthanization for control group; the last number represents different mice for repeats. Blue: control group, red: Inflammation group (treated with 1-2 AOM/DSS cycles), yellow: cancer group (treated with 3-4 AOM/DSS cycles),

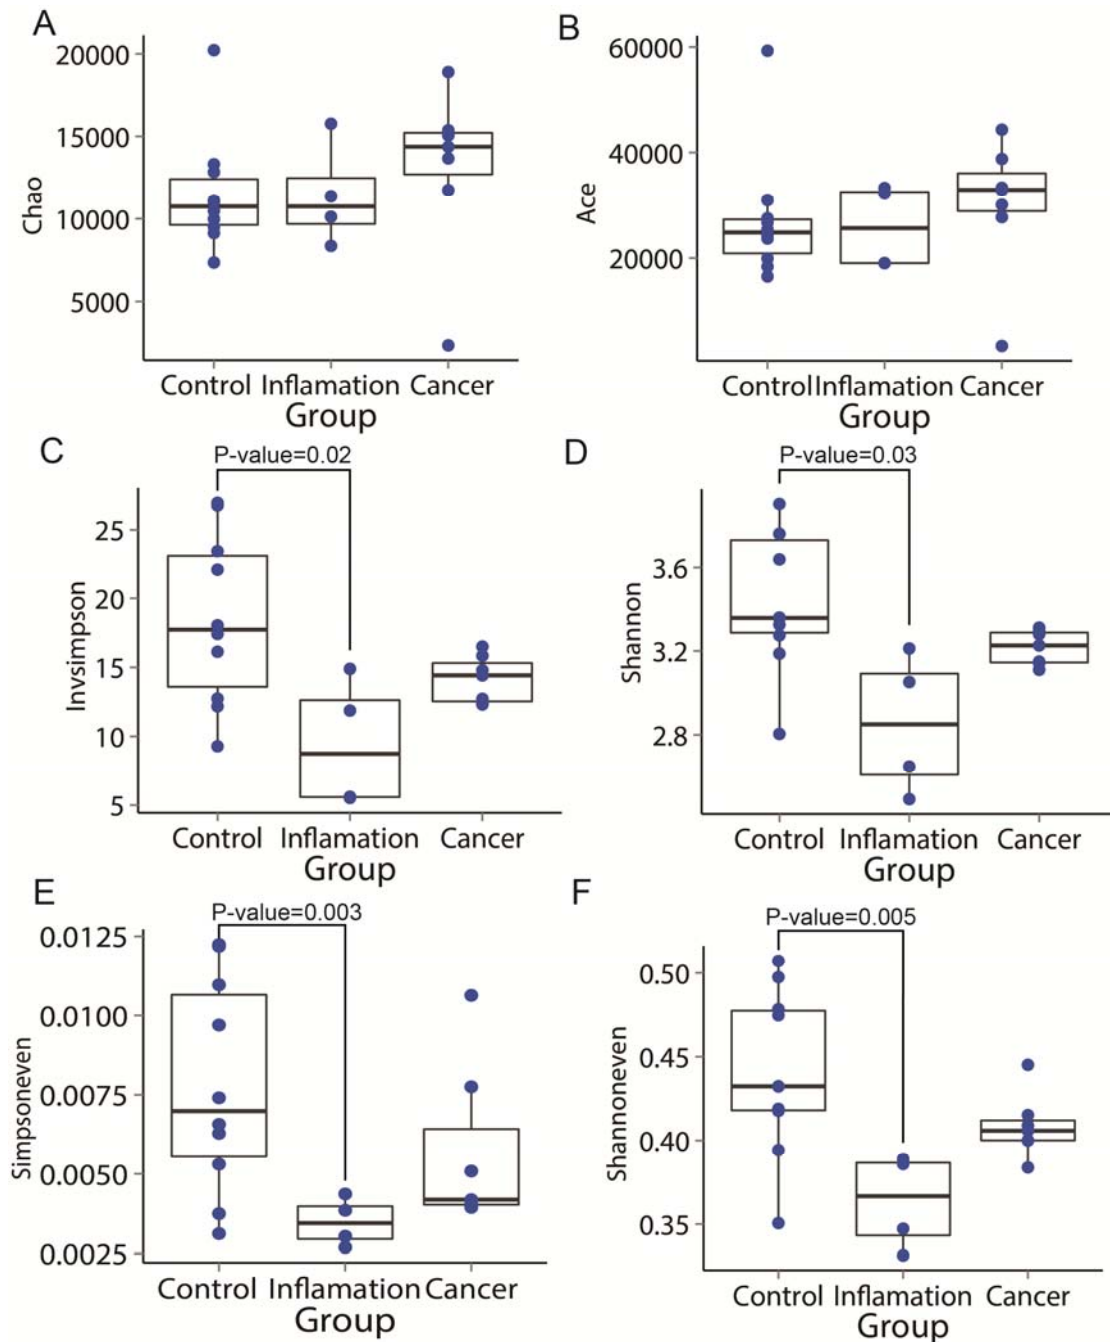

**Fig. S4 Box plots of estimators of alpha diversity.** (A) Chao, (B) ACE, (C) Inverse Simpson index, (D) Shannon index, (E) Simpson index-based measure of evenness, (F) Shannon index-based measure of evenness. Two-tailed Student's t tests were performed.

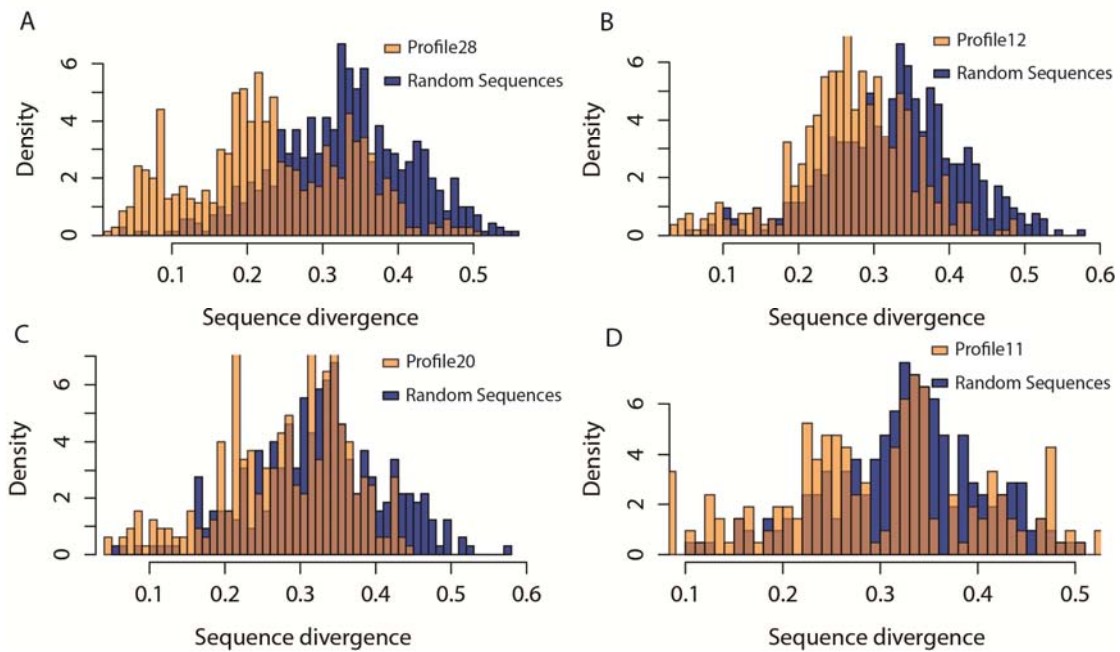

**Fig. S5 OTUs in the four largest profiles showed significant similarity than random sequences.** (A) Profile 28, P-value= 7.47E-55, (B) profile 12, P-value= 4.04E-23, (C) profile 20, P-value= 6.62E-07, (D) profile 11, P-value= 2.56E-06. Distributions were compared to random background by one tail non-parametric Kolmogorov-Smirnov test. Random background were calculated from randomly selected sequences of 97% OTUs in our study.

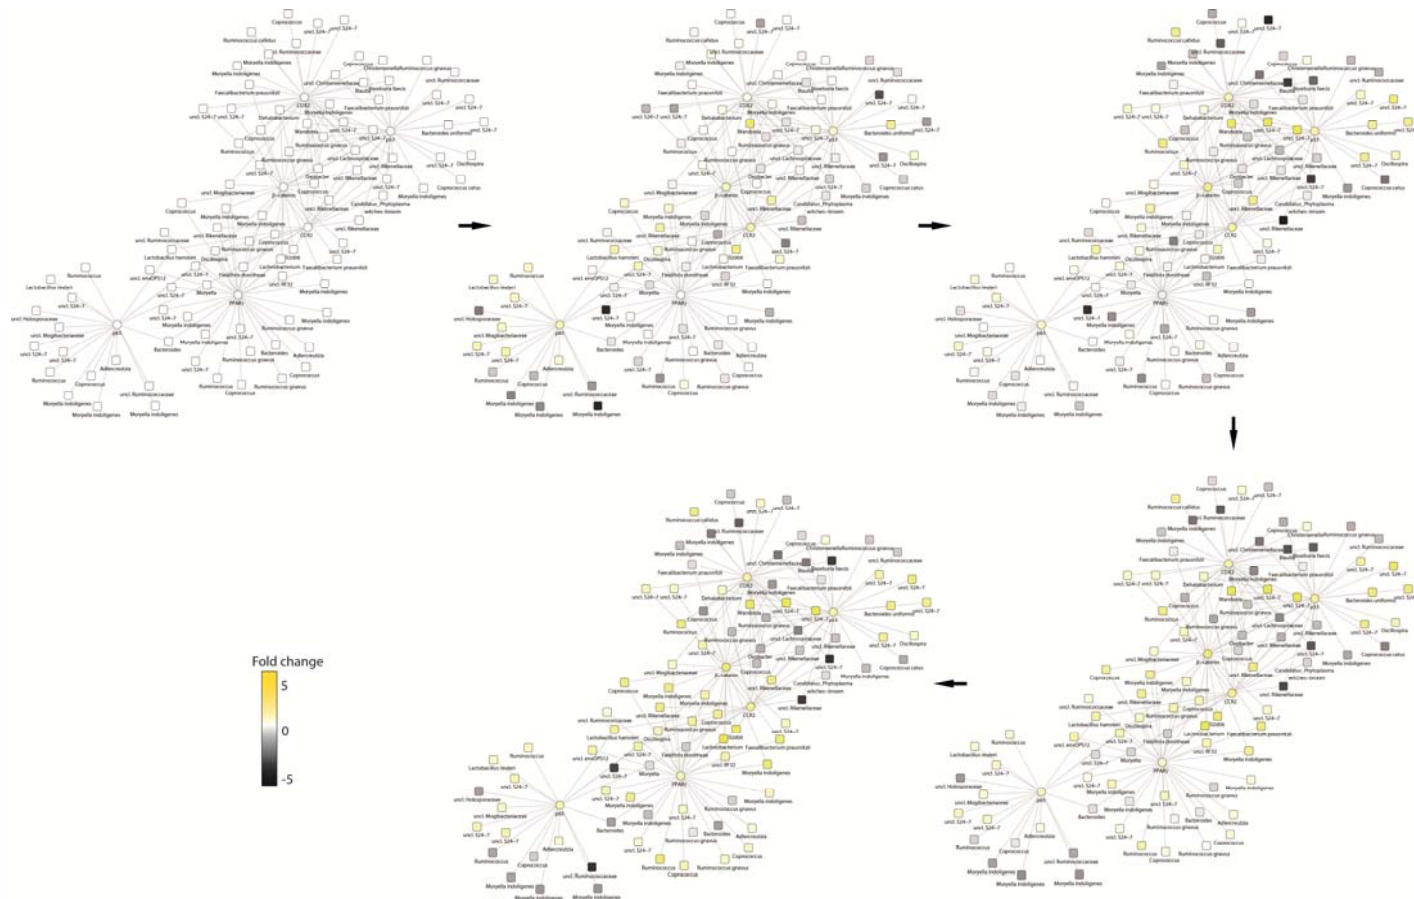

**Fig. S6 A** dynamic network shows the coordinated changes of molecules and OTUs. Six molecules (eclipse nodes) were connected to OTUs (square nodes) whose changes were significantly correlated with these molecules (P-value<0.05). The dynamic changes in the expression levels (trans-nuclear rate for p65) of the molecular markers and relative abundances of OTUs were log normalized and represented by color scale.
